# Supplementary material for: Involvement of covalent interactions in the mode of action of PPARβ/δ antagonists
Source: Royal Society of Chemistry journal article supplement (doi:10.1039/c5ra15707b), 2015-01-01
Supplement: c5ra15707b1.pdf [file c5ra15707b1.pdf]

# Electronic Supplementary Information

## INVOLVEMENT OF COVALENT INTERACTIONS IN THE MODE OF ACTION OF PPAR $\beta/\delta$ ANTAGONISTS

Åsmund Kaupang,<sup>a</sup> Siri Hildonen,<sup>a</sup> Trine G. Halvorsen,<sup>a</sup> Magnus Mortén,<sup>b</sup> Anders Vik<sup>a</sup> and Trond Vidar Hansen<sup>a\*</sup>

<sup>a</sup>Department of Pharmaceutical Chemistry, School of Pharmacy, University of Oslo, PO Box 1068, Blindern, 0316 Oslo, Norway

<sup>b</sup>Department of Chemistry, University of Oslo, PO Box 1033, Blindern, 0315 Oslo, Norway

\*Corresponding Author; Tel.: +47 22 85 74 50; E-mail: [t.v.hansen@farmasi.uio.no](mailto:t.v.hansen@farmasi.uio.no)

## Contents

|                                                                                                                            |    |
|----------------------------------------------------------------------------------------------------------------------------|----|
| General.....                                                                                                               | 2  |
| Protein treatment and Liquid Chromatography - Mass Spectrometry (LC-MS) .....                                              | 3  |
| Electrospray Ionization – Mass Spectrometry (ESI-MS).....                                                                  | 8  |
| Nuclear Magnetic Resonance (NMR) Spectroscopy .....                                                                        | 17 |
| UV-spectroscopy and pK <sub>a</sub> -calculations .....                                                                    | 27 |
| Off-rate Measurements with TR-FRET .....                                                                                   | 29 |
| Synthetic Chemistry .....                                                                                                  | 31 |
| Synthesis of identified products: .....                                                                                    | 31 |
| 2-((5-(trifluoromethyl)pyridin-2-yl)thio)ethan-1-ol ( <b>6</b> ) .....                                                     | 31 |
| 2-(2-bromophenyl)-3-((2-hydroxyethyl)thio)-3-(4-(4-methylpiperazin-1-yl)phenyl)propanenitrile ( <b>8a - b</b> ) .....      | 32 |
| Synthesis of starting materials:.....                                                                                      | 33 |
| 4-(4-methylpiperazin-1-yl)benzaldehyde ( <b>9</b> ) .....                                                                  | 33 |
| (Z)-2-(2-bromophenyl)-3-(4-(4-methylpiperazin-1-yl)phenyl)acrylonitrile (DG172, <b>4</b> ) .....                           | 34 |
| (Z)-2-(2-bromophenyl)-3-(4-(4-methylpiperazin-1-yl)phenyl)acrylonitrile dihydrochloride (DG172·2HCl, <b>4</b> ·2HCl) ..... | 35 |
| NMR Spectra .....                                                                                                          | 36 |
| 2-((5-(trifluoromethyl)pyridin-2-yl)thio)ethan-1-ol ( <b>6</b> ) .....                                                     | 36 |
| 2-(2-bromophenyl)-3-((2-hydroxyethyl)thio)-3-(4-(4-methylpiperazin-1-yl)phenyl)propanenitrile ( <b>8a - b</b> ) .....      | 37 |
| 4-(4-methylpiperazin-1-yl)benzaldehyde ( <b>9</b> ) .....                                                                  | 38 |
| (Z)-2-(2-bromophenyl)-3-(4-(4-methylpiperazin-1-yl)phenyl)acrylonitrile dihydrochloride(DG172·2HCl, <b>4</b> ·2HCl) .....  | 39 |
| High Performance Liquid Chromatography (HPLC) Chromatograms.....                                                           | 40 |
| (Z)-2-(2-bromophenyl)-3-(4-(4-methylpiperazin-1-yl)phenyl)acrylonitrile dihydrochloride (DG172·2HCl, <b>4</b> ·2HCl) ..... | 40 |
| References .....                                                                                                           | 41 |

## GENERAL

All commercially available reagents and solvents were used as received. GSK0660 ( $\geq 98$ , HPLC), potassium phosphate buffer (Fluka, 0.050 M, pH 7.2), potassium dihydrogen phosphate, dipotassium hydrogen phosphate, ammonium hydrogen carbonate (bicarbonate) (ABC), 1,4-dithiothreitol (DTT) and iodoacetic acid (IAA), all of analytical grade and sequencing grade, L-1-tosylamide-2-phenylethyl chloromethyl ketone (TPCK)-treated trypsin from bovine pancreas, were purchased from SIGMA-Aldrich, Inc. (St Louis, MO, USA). Acetonitrile Hypergrade for LC-MS ( $\text{CH}_3\text{CN}$ ) and dimethyl sulfoxide (DMSO, dried p.a.) were purchased from Merck, Darmstadt, Germany. Human recombinant *N*-His<sub>6</sub>-PPAR $\delta$  was purchased from Cayman Chemical, Ann Arbor, MI, USA. Lanthascreen™ TR-FRET PPAR $\delta$  Competitive Binding Assay (PV4893) was purchased from Life Technologies, Carlsbad, CA, USA.

MilliQ™ (mqH<sub>2</sub>O) water was produced in-house using a MilliQ™-system (Merck Millipore, Billerica, MA, USA). GSK3787 (**1**),<sup>1</sup> CC618 (**2**)<sup>2</sup> and 5-H-CC618 (**7**)<sup>2</sup> were prepared as previously described. Potassium phosphate buffers (1.0 M, pH 7.2 – 8.1) were prepared by titration of stirred 1.0 M solutions of  $\text{KH}_2\text{PO}_4$  in deionized water with 1.0 M solutions of  $\text{K}_2\text{HPO}_4$  to the desired pH endpoint, as measured with a Metrohm 744 pH Meter, calibrated at pH 7.0 and pH 9.0, twice before use.

Stirring refers to magnetic stirring in all the procedures. The stated yields are based on isolated material. Chromatography was performed on silica gel (Merck 60, 40 - 63  $\mu\text{m}$ ) and thin layer chromatography (TLC) on aluminum-backed silica gel plates (Merck silica gel 60 F<sub>254</sub>, 250  $\mu\text{m}$  thickness). The plates were visualized with UV light (254 or 366 nm) or by staining with  $\text{KMnO}_4$ ,  $\text{K}_2\text{CO}_3$  and NaOH in water, or with  $\text{Ce}(\text{SO}_4)_2$ ,  $(\text{NH}_4)_6\text{Mo}_7\text{O}_{24} \cdot 4\text{H}_2\text{O}$ ,  $\text{H}_2\text{SO}_4$  in water.

HPLC analyses were performed on an Agilent Technologies 1200 Series instrument equipped with an Agilent Eclipse XDB-C18 reverse phase column and a UV detector (254 nm).

Nuclear magnetic resonance (NMR) spectroscopy was performed on Bruker DPX300/AVII400/DRX500/AV600 spectrometers operating at 300/400/500/600 MHz for  $^1\text{H}$  and 75/101/125/151 MHz for  $^{13}\text{C}$ . Chemical shifts ( $\delta$ ) are reported in parts per million and coupling constants ( $J$ ) are reported in Hz. Chemical shifts are reported relative to the signal from the residual non-perdeuterated solvents, in accordance with the literature:<sup>3</sup>  $\delta$ - $^1\text{H}/\delta$ - $^{13}\text{C}$  (Solvent); 7.26/77.16 ( $\text{CDCl}_3$ ), 2.50/39.52 ( $\text{DMSO}-d_6$ ). The utilized  $\text{DMSO}-d_6$  contains a 0.03% v/v TMS internal standard which, in the aqueous reactions mixtures followed by  $^1\text{H}$  NMR, was used to align the spectra at 0.00 ppm for presentation. The obtained NMR data were processed and presented with MestReNova (ver. 8.0.1, MestreLab Research S.L.).

Mass spectrometry was carried out on a Fisons (Waters) VG ProSpec Q for electron impact ionization (EI) or a Micromass Q-TOF 2 for electrospray ionization (ESI), as indicated.

UV-spectroscopy was performed on a Biochrom Libra S32 PC, equipped with an 8-cell sample changer.

The TR-FRET assay was performed in black 96-well plates (Costar). The plates were read with a Victor X4 plate reader (PerkinElmer), equipped with the recommended filters and set up according to recommendations of the assay manufacturer.<sup>4</sup>

## PROTEIN TREATMENT AND LIQUID CHROMATOGRAPHY - MASS SPECTROMETRY (LC-MS)

**Ligand treatment and in-solution digestion of *N*-His<sub>6</sub>-PPAR $\beta$ / $\delta$ :** 10  $\mu$ g (1 mg/mL) of human recombinant *N*-His<sub>6</sub>-PPAR $\beta$ / $\delta$ , stored at -80 °C (CO<sub>2</sub>(s)), was thawed in an ice/water bath, diluted to a concentration of 50  $\mu$ g/mL using 190  $\mu$ L of freshly made 50 mM ABC buffer, fractionated to 10 stock solutions of 20  $\mu$ L and subsequently refrozen at -30 °C. Prior to ligand treatment and in-solution digestion, 10  $\mu$ L of the above described 50  $\mu$ g/mL stock solution of human recombinant *N*-His<sub>6</sub>-PPAR $\beta$ / $\delta$  was thawed on ice in a Protein LoBind Eppendorf tube (Eppendorf AG, Hamburg, Germany) and subsequently diluted with 10  $\mu$ L of a freshly made solution of 375  $\mu$ M of DTT in 50 mM ABC buffer. The solution was left on ice for 5 min and then added 10  $\mu$ L of a 30  $\mu$ M solution of compound **3**, **4** or **7** in 50 mM ABC buffer (w/ 1% of CH<sub>3</sub>CN), resulting in a final concentration of 125  $\mu$ M of DTT<sup>5</sup> and 10  $\mu$ M of ligand. The solution was incubated at ambient temperature for 15 min, diluted with 55  $\mu$ L of 50 mM ABC buffer and added 5  $\mu$ L of a solution containing 50 mM DTT in 50 mM ABC buffer. After incubation for 15 minutes at 95 °C and subsequent cooling to ambient temperature, 5  $\mu$ L of a freshly prepared solution of 250 mM iodoacetic acid (IAA) in 50 mM ABC buffer was added and the solution was incubated in the dark at ambient temperature for 20 minutes. Following alkylation, 5  $\mu$ L of a freshly prepared solution of containing 2.5  $\mu$ g/mL bovine trypsin in 50 mM ABC buffer (trypsin:protein ratio, 1:40 (w/w)) was added and the sample was incubated at 37 °C overnight using a Thermomixer Comfort (Thermo Scientific) at 800 rpm. The final protein concentration was 5  $\mu$ g/mL in all experiments.

**LC-MS/MS analysis:** Samples of 20  $\mu$ L of the proteolytic peptide mixtures were injected into the Chromeleon Xpress-controlled Dionex HPLC system (Thermo Scientific, Bremen, Germany) and trapped on a C18, 5 mm x 300  $\mu$ m i.d. Acclaim PepMap 100 (5  $\mu$ m) enrichment column (Thermo Scientific). The loading mobile phase consisting of 3% CH<sub>3</sub>CN, 0.1% FA and 97% mqH<sub>2</sub>O, was delivered at 10  $\mu$ L/min for 4 minutes. The analytes were transferred to a 150 x 0.075 mm i.d. Acclaim PepMap 100 (pore size 100 Å, particle diameter 3  $\mu$ m; Thermo Scientific) at 300 nL/min. The mobile phases consisted of A: 5% CH<sub>3</sub>CN, 0.1% FA and 95% mqH<sub>2</sub>O, and B: 95% CH<sub>3</sub>CN, 0.1% FA and 5% mqH<sub>2</sub>O. A linear gradient was run from 0% to 50% B in 60 minutes. Subsequently, the elution strength was increased to 100% B, before the column was regenerated for at least 10 column volumes. Total analysis time per run was 87 minutes. The LC setup was connected to an Xcalibur 2.0.7-controlled LTQ Discovery Orbitrap MS equipped with a Nano-ESI ion source (Thermo Fischer). The nanospray ionization source was operated in the positive ionization mode (360  $\mu$ m o.d. x 20  $\mu$ m i.d. distal coated fused silica emitter, 10  $\mu$ m i.d. tip (New Objective, Woburn, MA, USA)). The spray voltage was set at 2.2 kV. The heated capillary was kept at 275 °C. The capillary voltage was set at 45 V and the tube lens offset at 120 V. The mass spectrometer was operated in data-dependent positive ion mode. Survey MS scans were performed in the orbitrap analyzer at a resolution of 30000, over a mass range between m/z 250 - 2000 Da, with charge state disabled. The up to 6 most intense ions per scan were fragmented by collision induced dissociation (CID) at 35% relative collision energy, activation time of 30 ms, minimum signal required of 500 and analyzed in the linear ion trap. The wide band activation option was enabled and dynamic exclusion of a time window of 15 seconds was used to minimize the extent of repeat sequencing of the peptides.

**Data interpretation:** The MS raw files were processed with Proteome Discoverer 1.3 (Thermo Scientific), using the Sequest algorithm, searching against a FASTA file containing all verified human proteins in UNIPROT.<sup>6</sup> Enzyme specificity was set to trypsin. The initial parent and fragment ion maximum mass deviations were set to 20 ppm and 0.6 Da, respectively. The search included cysteine carboxymethylation and modification of cysteine, histidine, arginine or lysine, with masses corresponding to the possible chemical modifications discussed in the text, as variable modifications. Peptides had to be fully tryptic, and up to two missed cleavages were allowed. A decoy database search was performed by searching against a database containing the reversed protein sequences with a strict target false discovery rate (FDR) of 0.01 and a relaxed FDR of 0.05.

## Detected Cys249-containing peptides:

A representative MS/MS spectrum of the covalently modified Cys249-peptides obtained by treatment of PPAR $\beta/\delta$  with GSK3787 (**1**) or CC618 (**2**), has been reported previously.<sup>2</sup>

For comparison, we analyzed the tryptic peptides obtained from apo-PPAR $\beta/\delta$  (no added ligand). The Cys249-containing peptide, corresponding to the peptides shown for the ligand-treated protein solutions (Figure S2 – S4), is shown below (Figure S1).

Sequence: CQCTTVETVRELTEFAK, C1-Carboxymethyl (58.00548 Da), C3-Carboxymethyl (58.00548 Da)  
 Charge: +2, Monoisotopic m/z: 1037.47742 Da (+0.37 mmu/+0.36 ppm), MH<sup>+</sup>: 2073.94756 Da, RT: 43.54 min,  
 Identified with: Sequest HT (v1.3); XCorr: 3.65, Ions matched by search engine: 0/0  
 Fragment match tolerance used for search: 0.6 Da  
 Fragments used for search: b; b-H<sub>2</sub>O; b-NH<sub>3</sub>; y; y-H<sub>2</sub>O; y-NH<sub>3</sub>

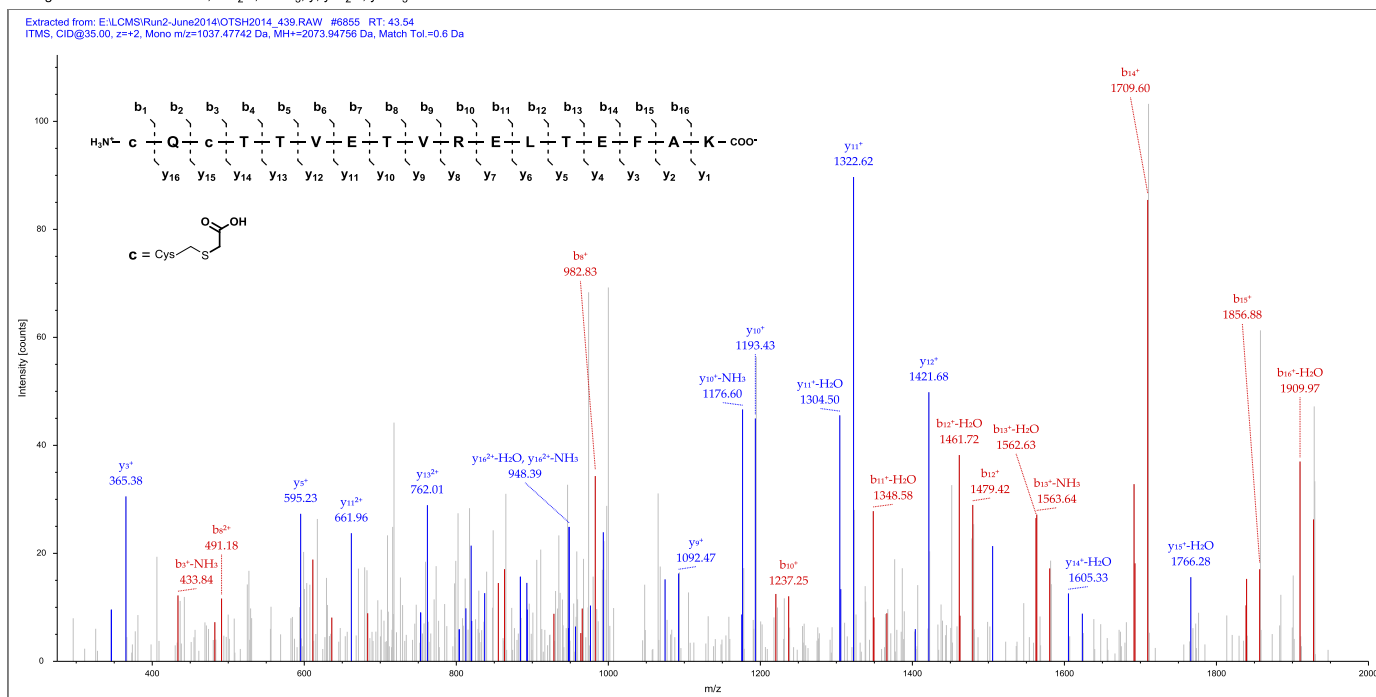

**Figure S1** MS/MS spectrum of the Cys249-containing peptide CQCTTVETVRELTEFAK, obtained from the tryptic digestion of apo-PPAR $\beta/\delta$ , in which both Cys249 and Cys251 are found to be carboxymethylated. This spectrum is shown for comparison with Figures S2 – S4.

Sequence: CQCTTVETVRELTEFAK, C1-Carboxymethyl (58.00548 Da), C3-Carboxymethyl (58.00548 Da)  
 Charge: +2, Monoisotopic m/z: 1037.48584 Da (+8.8 mmu/+8.48 ppm), MH<sup>+</sup>: 2073.96440 Da, RT: 50.36 min,  
 Identified with: Sequest HT (v1.3); XCorr:3.53, Ions matched by search engine: 0/0  
 Fragment match tolerance used for search: 0.6 Da  
 Fragments used for search: b; b-H<sub>2</sub>O; b-NH<sub>3</sub>; y; y-H<sub>2</sub>O; y-NH<sub>3</sub>

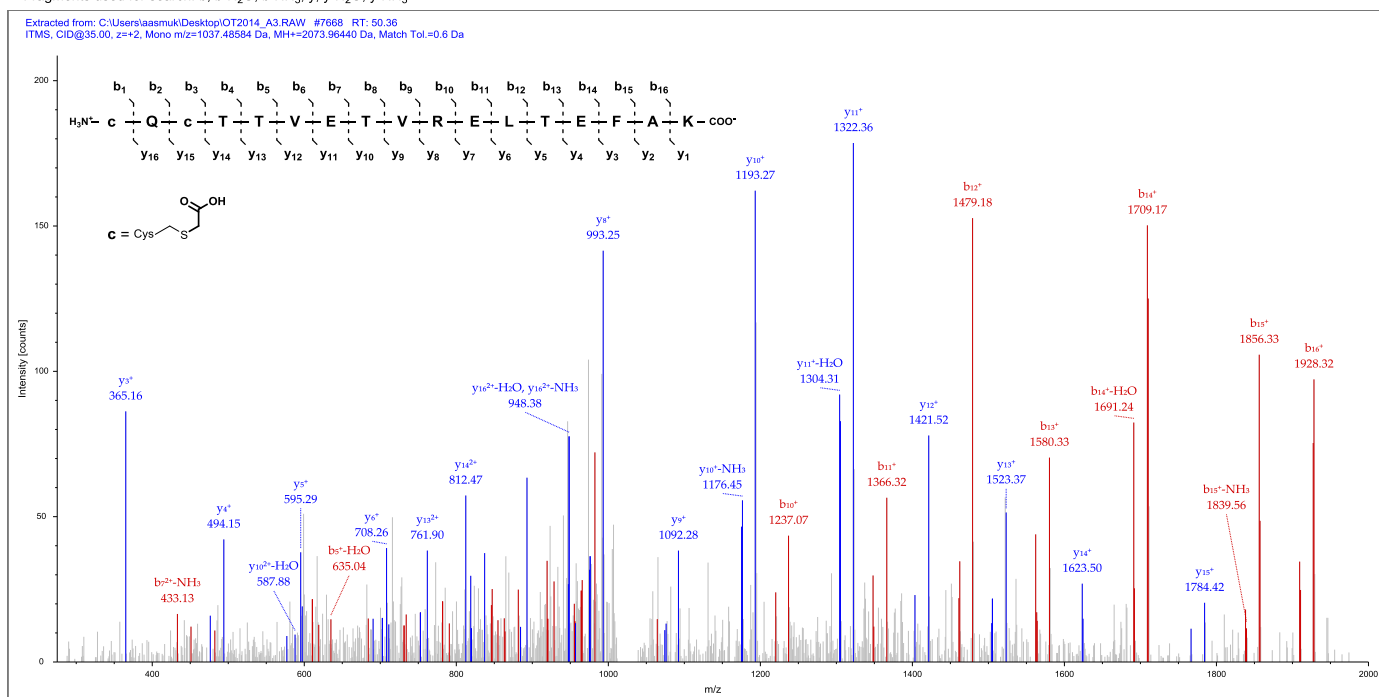

**Figure S2** MS/MS spectrum of the Cys249-containing peptide CQCTTVETVRELTEFAK, obtained from the tryptic digestion of PPAR $\beta/\delta$ , treated with 10  $\mu\text{M}$  of 5-H-CC618 (**7**), in which both Cys249 and Cys251 are found to be carboxymethylated. No modification of Cys249, corresponding to an S<sub>N</sub>Ar reaction with 5-H-CC618 (**7**), was observed.

Extracted from: C:\Users\laasmuk\Desktop\OT2014\_A9.RAW #7544 RT: 50.28  
 ITMS: CID@35.00, z=+2, Mono m/z=1037.48621 Da, MH+=2073.96514 Da, Match Tol.=0.6 Da

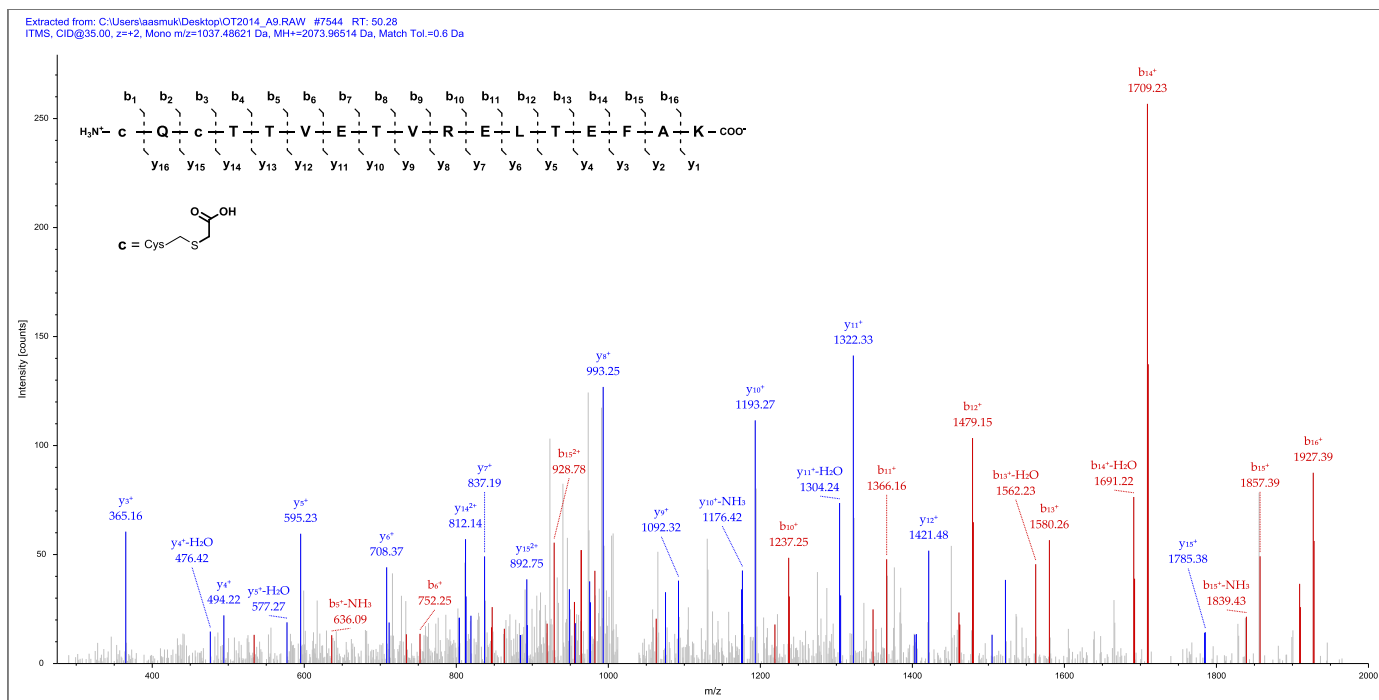

6

Sequence: CQCTTVETVRELTEFAK, C1-Carboxymethyl (58.00548 Da), C3-Carboxymethyl (58.00548 Da)  
 Charge: +2, Monoisotopic m/z: 1037.48474 Da (+7.7 mmu/+7.42 ppm), MH<sup>+</sup>: 2073.96221 Da, RT: 50.59 min,  
 Identified with: Sequest HT (v1.3); XCorr:3.02, Ions matched by search engine: 0/0  
 Fragment match tolerance used for search: 0.6 Da  
 Fragments used for search: b; b-H<sub>2</sub>O; b-NH<sub>3</sub>; y; y-H<sub>2</sub>O; y-NH<sub>3</sub>

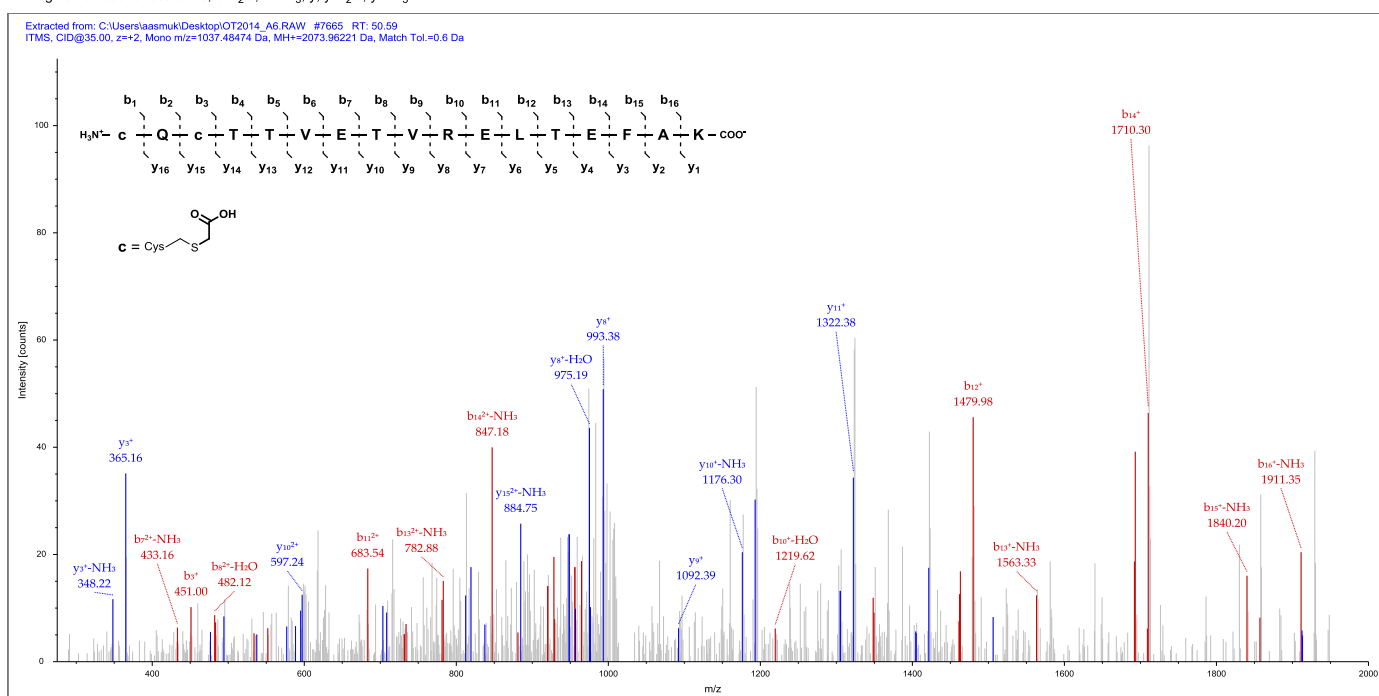

**Figure S4** MS/MS spectrum of the Cys249-containing peptide CQCTTVETVRELTEFAK, obtained from the tryptic digestion of PPAR $\beta/\delta$ , treated with 10  $\mu\text{M}$  of DG172 (**4**), in which both Cys249 and Cys251 are found to be carboxymethylated. No modification of Cys249, corresponding to a 1,4-conjugate addition reaction with DG172 (**4**), was observed.

## ELECTROSPRAY IONIZATION – MASS SPECTROMETRY (ESI-MS)

To a 1 mL sample vial containing a CH<sub>3</sub>OH solution with the indicated concentration of each compound and DMSO (see Table S1), was added a solution of the indicated amount of 2-ME in potassium phosphate buffer (PB) (0.050 M, pH 7.2) to a CH<sub>3</sub>OH:PB-ratio of 6:1 (total volumes ranged from 200 to 500  $\mu$ L). The vial was purged with argon, capped and vigorously shaken. It was then kept in the dark, at ambient temperature, for 96 hours, before performing the mass spectrometrical analysis, using electrospray ionization (ESI) and a quadrupole time-of-flight (Q-TOF) detector, in positive and negative ion modes. HCOOH and triethylamine were used to aid ionization in positive and negative ion mode, respectively. The recorded ions ( $\geq$  2% of the base peak) are listed for the reactions with each compound below and assigned where possible.

| Entry | Compound                            |               | 2-ME          |                | Ratio<br>CH <sub>3</sub> OH:PB | PB<br>pH <sup>a</sup> | PB<br>(M) | DMSO<br>%v/v |
|-------|-------------------------------------|---------------|---------------|----------------|--------------------------------|-----------------------|-----------|--------------|
|       | Name                                | Conc.<br>(mM) | Conc.<br>(mM) | Amount<br>(eq) |                                |                       |           |              |
| 1     | GSK3787 ( <b>1</b> ) <sup>1</sup>   | 6.00          | 60.0          | 10             | 6:1                            | 7.2                   | 0.050     | 2.4          |
| 2     | CC618 ( <b>2</b> ) <sup>2</sup>     | 6.00          | 60.0          | 10             | 6:1                            | 7.2                   | 0.050     | 2.4          |
| 3     | GSK0660 ( <b>3</b> ) <sup>7,8</sup> | 4.0           | 400.0         | 100            | 6:1                            | 7.2                   | 0.050     | 5.3          |
| 4     | GSK0660 ( <b>3</b> )                | 3.0           | 30            | 10             | 6:1                            | 7.2                   | 1.0       | 0            |
| 5     | GSK0660 ( <b>3</b> )                | 3.0           | 30            | 10             | 6:1                            | 7.8                   | 1.0       | 0            |
| 6     | GSK0660 ( <b>3</b> )                | 3.0           | 300           | 100            | 6:1                            | 7.8                   | 1.0       | 0            |
| 7     | GSK0660 ( <b>3</b> )                | 3.0           | 0             | 0              | 6:1                            | 7.8                   | 1.0       | 0            |
| 8     | DG172 ( <b>4</b> ) <sup>9</sup>     | 6.0           | 150.0         | 25             | 6:1                            | 7.2                   | 0.050     | 2.4          |

<sup>a</sup>The initial pH of the buffer.

**Table S1** Experimental details from the reactions analyzed by ESI-MS.



**Entry 1: GSK3787** (C<sub>15</sub>H<sub>12</sub>ClF<sub>3</sub>N<sub>2</sub>O<sub>3</sub>S) + 2-ME (10 eq), in CH<sub>3</sub>OH/PB (0.050 M, pH 7.2):

**TOF+**

| <i>m/z</i> (%)     | Assignment                                                                                                                              |
|--------------------|-----------------------------------------------------------------------------------------------------------------------------------------|
| 206.0 (24)         | [2-((5-(trifluoromethyl)pyridin-2-yl)thio)ethan-1-ol – H <sub>2</sub> O + H] <sup>+</sup>                                               |
| 224.0 (100)        | [2-((5-(trifluoromethyl)pyridin-2-yl)thio)ethan-1-ol + H] <sup>+</sup>                                                                  |
| 270.0/272.0 (12/4) | [2-(4-chlorobenzamido)ethane-1-sulfinic acid + Na] <sup>+</sup>                                                                         |
| 285.9/287.9 (6/2)  | [2-(4-chlorobenzamido)ethane-1-sulfinic acid + K] <sup>+</sup><br>or<br>[2-(4-chlorobenzamido)ethane-1-sulfonic acid + Na] <sup>+</sup> |
| 431.0/433.0 (17/6) | [GSK3787 + K] <sup>+</sup>                                                                                                              |

**TOF-**

| <i>m/z</i> (%)       | Assignment                                             |
|----------------------|--------------------------------------------------------|
| 154.0/156.0 (12/4)   | [4-chlorobenzimidate] <sup>–</sup>                     |
| 246.0/248.0 (100/34) | [2-(4-chlorobenzamido)ethane-1-sulfinate] <sup>–</sup> |
| 262.0/264.0 (13/5)   | [2-(4-chlorobenzamido)ethane-1-sulfonate] <sup>–</sup> |

**Entry 2: CC618** ( $C_{20}H_{15}F_6N_3O_3S_2$ ) + 2-ME (10 eq), in  $CH_3OH/PB$  (0.050 M, pH 7.2):

**TOF+**

| <i>m/z</i> (%) | Assignment                                                                                                                                                                                                                                                          |
|----------------|---------------------------------------------------------------------------------------------------------------------------------------------------------------------------------------------------------------------------------------------------------------------|
| 206.0 (100)    | $[2-((5-(\text{trifluoromethyl})\text{pyridin-2-yl})\text{thio})\text{ethan-1-ol} - H_2O + H]^+$                                                                                                                                                                    |
| 224.0 (9)      | $[2-((5-(\text{trifluoromethyl})\text{pyridin-2-yl})\text{thio})\text{ethan-1-ol} + H]^+$                                                                                                                                                                           |
| 379.0 (71)     | $[2-(4\text{-methyl-2-(4-(\text{trifluoromethyl})\text{phenyl})thiazole-5-carboxamido})\text{ethane-1-sulfinic acid} + H]^+$                                                                                                                                        |
| 401.0 (27)     | $[2-(4\text{-methyl-2-(4-(\text{trifluoromethyl})\text{phenyl})thiazole-5-carboxamido})\text{ethane-1-sulfinic acid} + Na]^+$                                                                                                                                       |
| 417.0 (10)     | $[2-(4\text{-methyl-2-(4-(\text{trifluoromethyl})\text{phenyl})thiazole-5-carboxamido})\text{ethane-1-sulfinic acid} + K]^+$<br>or<br>$[2-(4\text{-methyl-2-(4-(\text{trifluoromethyl})\text{phenyl})thiazole-5-carboxamido})\text{ethane-1-sulfonic acid} + Na]^+$ |
| 501.0 (18)     | Not assigned                                                                                                                                                                                                                                                        |
| 524.0 (11)     | $[CC618 + H]^+$ ,                                                                                                                                                                                                                                                   |
| 562.0 (9)      | $[CC618 + K]^+$                                                                                                                                                                                                                                                     |

**TOF-**

| <i>m/z</i> (%) | Assignment                                                                                                           |
|----------------|----------------------------------------------------------------------------------------------------------------------|
| 377.0 (100)    | $[2-(4\text{-methyl-2-(4-(\text{trifluoromethyl})\text{phenyl})thiazole-5-carboxamido})\text{ethane-1-sulfinate}]^-$ |
| 393.0 (10)     | $[2-(4\text{-methyl-2-(4-(\text{trifluoromethyl})\text{phenyl})thiazole-5-carboxamido})\text{ethane-1-sulfonate}]^-$ |

**Entry 3: GSK0660** (C<sub>19</sub>H<sub>18</sub>N<sub>2</sub>O<sub>5</sub>S<sub>2</sub>) + 2-ME (100 eq), in CH<sub>3</sub>OH/PB (0.050 M, pH 7.2):

**TOF+**

| <i>m/z</i> (%) | Assignment                                                                                                                                                                                        |
|----------------|---------------------------------------------------------------------------------------------------------------------------------------------------------------------------------------------------|
| 214.1 (6)      | [3-methoxy- <i>N</i> <sup>1</sup> -phenylbenzene-1,4-diamine] <sup>+</sup><br><b>HRMS</b> calcd. for C <sub>13</sub> H <sub>14</sub> N <sub>2</sub> O: 214.1106; found: 214.1116 (+ 4.6 ppm)      |
| 229.0 (15)     | [2-(methoxycarbonyl)thiophene-3-sulfinic acid + Na] <sup>+</sup><br><b>HRMS</b> calcd. for C <sub>6</sub> H <sub>6</sub> O <sub>4</sub> S <sub>2</sub> Na: 228.9605; found: 228.9613 (+ 3.38 ppm) |
| 244.9 (4)      | [2-(methoxycarbonyl)thiophene-3-sulfinic acid + K] <sup>+</sup><br><b>HRMS</b> calcd. for C <sub>6</sub> H <sub>6</sub> O <sub>4</sub> S <sub>2</sub> K: 244.9344; found: 244.9353 (+ 3.42 ppm)   |
| 441.1 (41)     | [GSK0660 + Na] <sup>+</sup>                                                                                                                                                                       |
| 457.0 (100)    | [GSK0660 + K] <sup>+</sup>                                                                                                                                                                        |
| 859.1 (24)     | [2 GSK0660 + Na] <sup>+</sup>                                                                                                                                                                     |
| 875.1 (33)     | [2 GSK0660 + K] <sup>+</sup>                                                                                                                                                                      |

**TOF-**

| <i>m/z</i> (%) | Assignment                  |
|----------------|-----------------------------|
| 417.0 (100)    | [GSK0660 – H] <sup>–</sup>  |
| 453.0 (3)      | [GSK0660 + Cl] <sup>–</sup> |

**Entry 4: GSK0660** ( $\text{C}_{19}\text{H}_{18}\text{N}_2\text{O}_5\text{S}_2$ ) + 2-ME (10 eq), in  $\text{CH}_3\text{OH}/\text{PB}$  (1.0 M, pH 7.2):

**TOF+**

| <i>m/z</i> (%) | Assignment                                                           |
|----------------|----------------------------------------------------------------------|
| 244.9 (3)      | $[\text{2-(methoxycarbonyl)thiophene-3-sulfinic acid} + \text{K}]^+$ |
| 457.0 (100)    | $[\text{GSK0660} + \text{K}]^+$                                      |
| 495.0 (14)     | $[\text{GSK0660} - \text{H} + 2 \text{ K}]^+$                        |
| 875.1 (2)      | $[2 \text{ GSK0660} + \text{K}]^+$                                   |

**TOF-**

| <i>m/z</i> (%) | Assignment                                                            |
|----------------|-----------------------------------------------------------------------|
| 359.1 (12)     | $[\text{GSK0660} - \text{H} - (\text{CO}_2\text{CH}_3 + \text{H})]^-$ |
| 417.1 (100)    | $[\text{GSK0660} - \text{H}]^-$                                       |

**Entry 5: GSK0660** ( $\text{C}_{19}\text{H}_{18}\text{N}_2\text{O}_5\text{S}_2$ ) + 2-ME (10 eq), in  $\text{CH}_3\text{OH}/\text{PB}$  (1.0 M, pH 7.8):

**TOF+**

| <i>m/z</i> (%) | Assignment                                                      |
|----------------|-----------------------------------------------------------------|
| 244.9 (2)      | [2-(methoxycarbonyl)thiophene-3-sulfinic acid + K] <sup>+</sup> |
| 457.0 (100)    | [GSK0660 + K] <sup>+</sup>                                      |
| 495.0 (2)      | [GSK0660 –H + 2 K] <sup>+</sup>                                 |

**TOF-**

| <i>m/z</i> (%) | Assignment                                                         |
|----------------|--------------------------------------------------------------------|
| 359.1 (28)     | [GSK0660 – H – (CO <sub>2</sub> CH <sub>3</sub> + H)] <sup>–</sup> |
| 417.1 (100)    | [GSK0660 – H] <sup>–</sup>                                         |

**Entry 6: GSK0660** ( $\text{C}_{19}\text{H}_{18}\text{N}_2\text{O}_5\text{S}_2$ ) + 2-ME (100 eq), in  $\text{CH}_3\text{OH}/\text{PB}$  (1.0 M, pH 7.8):

**TOF+**

| <i>m/z</i> (%) | Assignment                                                      |
|----------------|-----------------------------------------------------------------|
| 244.9 (4)      | [2-(methoxycarbonyl)thiophene-3-sulfinic acid + K] <sup>+</sup> |
| 386.7 (5)      | Not assigned                                                    |
| 457.0 (100)    | [GSK0660 + K] <sup>+</sup>                                      |
| 495.0 (49)     | [GSK0660 –H + 2 K] <sup>+</sup>                                 |

**TOF-**

| <i>m/z</i> (%) | Assignment                                                         |
|----------------|--------------------------------------------------------------------|
| 359.1 (9)      | [GSK0660 – H – (CO <sub>2</sub> CH <sub>3</sub> + H)] <sup>–</sup> |
| 417.1 (100)    | [GSK0660 – H] <sup>–</sup>                                         |

**Entry 7: GSK0660** (C<sub>19</sub>H<sub>18</sub>N<sub>2</sub>O<sub>5</sub>S<sub>2</sub>) in CH<sub>3</sub>OH/PB (1.0 M, pH 7.8):

**TOF+**

| <i>m/z</i> (%) | Assignment                                                      |
|----------------|-----------------------------------------------------------------|
| 244.9 (3)      | [2-(methoxycarbonyl)thiophene-3-sulfinic acid + K] <sup>+</sup> |
| 386.8 (5)      | Not assigned                                                    |
| 457.0 (100)    | [GSK0660 + K] <sup>+</sup>                                      |
| 495.0 (17)     | [GSK0660 –H + 2 K] <sup>+</sup>                                 |

**TOF-**

| <i>m/z</i> (%) | Assignment                                                                                                                                                                                                        |
|----------------|-------------------------------------------------------------------------------------------------------------------------------------------------------------------------------------------------------------------|
| 189.1 (8)      | Not assigned                                                                                                                                                                                                      |
| 205.1 (4)      | Not assigned                                                                                                                                                                                                      |
| 243.1 (3)      | Not assigned                                                                                                                                                                                                      |
| 359.1 (43)     | [GSK0660 – H – (CO <sub>2</sub> CH <sub>3</sub> + H)] <sup>–</sup><br><b>HRMS</b> calcd. for C <sub>17</sub> H <sub>15</sub> N <sub>3</sub> O <sub>3</sub> S <sub>2</sub> : 359.0524; found: 359.0529 (+1.35 ppm) |
| 417.1 (100)    | [GSK0660 – H] <sup>–</sup>                                                                                                                                                                                        |

**Entry 8: DG172** ( $\text{C}_{20}\text{H}_{20}\text{BrN}_3$ ) + 2-ME (25 eq), in  $\text{CH}_3\text{OH}/\text{PB}$  (0.050 M, pH 7.2):

**TOF+**

| <i>m/z</i> (%)       | Assignment                     |
|----------------------|--------------------------------|
| 382.1/384.1 (56/54)  | [DG172 + H] <sup>+</sup>       |
| 420.1/422.1 (6/7)    | [DG172 + K] <sup>+</sup>       |
| 460.1/462.1 (98/100) | [DG172-2-ME + H] <sup>+</sup>  |
| 482.1/484.1 (3/3)    | [DG172-2-ME + Na] <sup>+</sup> |
| 498.1/500.1 (17/19)  | [DG172-2-ME + K] <sup>+</sup>  |



## NUCLEAR MAGNETIC RESONANCE (NMR) SPECTROSCOPY

To an NMR tube was added DMSO- $d_6$  (500  $\mu$ L), followed by a DMSO- $d_6$  solution (20  $\mu$ L) containing the indicated amount of each compound (see Table S2). The solution was vortexed to homogeneity before adding the indicated amount of 2-ME in potassium phosphate buffer (PB) (0.050 M, pH 7.2, 100  $\mu$ L). The NMR tube was then vigorously shaken prior to insertion into the NMR magnet (Bruker DRX500). Subsequently, a presaturation water suppression pulse sequence (Ic1pnf2) was employed to record water-suppressed  $^1\text{H}$  NMR spectra at fixed intervals, instantiated by the multi\_zgvd script in the Bruker TopSpin (ver. 1.3) software. The resulting NMR data were processed with MestReNova (ver. 8.0.1, MestReLabs Inc.). The absolute integrals of comparable signals from the starting material and eventual identifiable products, spanning the entire time series, were exported to Microsoft Excel, normalized and Origin (ver. 9.1.0, OriginLab Corporation) was then used to produce the graphs seen in figures S8, S10 and S12.

| Compound                            |                        | 2-ME                   |                | Buffer               |                 | NMR<br>experimental details        |                           |
|-------------------------------------|------------------------|------------------------|----------------|----------------------|-----------------|------------------------------------|---------------------------|
| Name                                | Amount<br>( $\mu$ mol) | Amount<br>( $\mu$ mol) | Amount<br>(eq) | Concentration<br>(M) | pH <sup>a</sup> | Recording<br>interval<br>(minutes) | Recording time<br>(hours) |
| GSK3787 ( <b>1</b> ) <sup>1</sup>   | 5.00                   | 50.25                  | 10.05          | 0.050                | 7.2             | 15                                 | 24                        |
| CC618 ( <b>2</b> ) <sup>2</sup>     | 5.00                   | 50.25                  | 10.05          | 0.050                | 7.2             | 15                                 | 24                        |
| 5-H-CC618 ( <b>7</b> ) <sup>2</sup> | 5.00                   | 50.25                  | 10.05          | 0.050                | 7.2             | 15                                 | 24                        |
| GSK0660 ( <b>3</b> ) <sup>7,8</sup> | 2.25                   | 56.25                  | 25.00          | 0.050                | 7.2             | 15                                 | 24                        |
| GSK0660 ( <b>3</b> )                | 2.25                   | 225.6                  | 100.3          | 0.050                | 7.2             | 15                                 | 24                        |
| DG172 ( <b>4</b> ) <sup>9</sup>     | 7.50                   | 7.50                   | 10.00          | 0.050                | 7.2             | 10                                 | 24                        |
| DG172 ( <b>4</b> )                  | 7.50                   | 187.5                  | 25.00          | 0.050                | 7.2             | 10                                 | 24                        |
| DG172 ( <b>4</b> )                  | 7.50                   | 750.0                  | 100.0          | 0.050                | 7.2             | 10                                 | 24                        |
| DG172·HCl ( <b>4</b> ·HCl)          | 5.00                   | 50.00                  | 10.00          | 1.0                  | 7.2             | (0, 24 h)                          | 24                        |
| DG172·HCl ( <b>4</b> ·HCl)          | 5.00                   | 50.00                  | 10.00          | 1.0                  | 7.5             | (0, 24 h)                          | 24                        |
| DG172·HCl ( <b>4</b> ·HCl)          | 5.00                   | 50.00                  | 10.00          | 1.0                  | 7.8             | (0, 24 h)                          | 24                        |
| DG172·HCl ( <b>4</b> ·HCl)          | 5.00                   | 50.00                  | 10.00          | 1.0                  | 8.1             | (0, 24 h)                          | 24                        |

<sup>a</sup>The initial pH of the buffer.

**Table S2** Experimental details from the reactions monitored by  $^1\text{H}$  NMR.

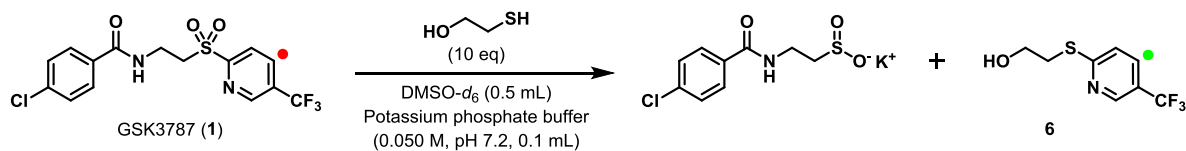

GSK3787 (5  $\mu\text{mol}$ ) in DMSO- $d_6$ /0.050 M PB, pH 7.2 (500/100  $\mu\text{L}$ )

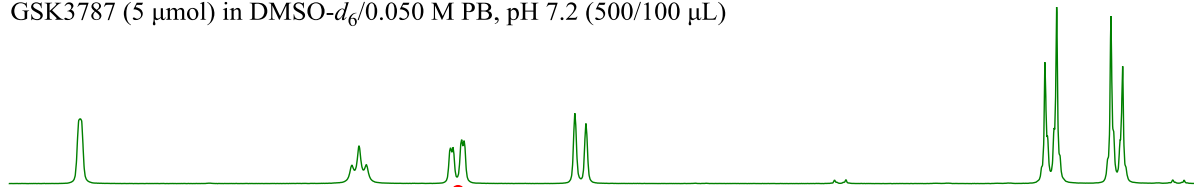

GSK3787 (5  $\mu\text{mol}$ ) in DMSO- $d_6$ /0.050 M PB, pH 7.2 (500/100  $\mu\text{L}$ ) + 10 eq 2-ME (after 24 hours)

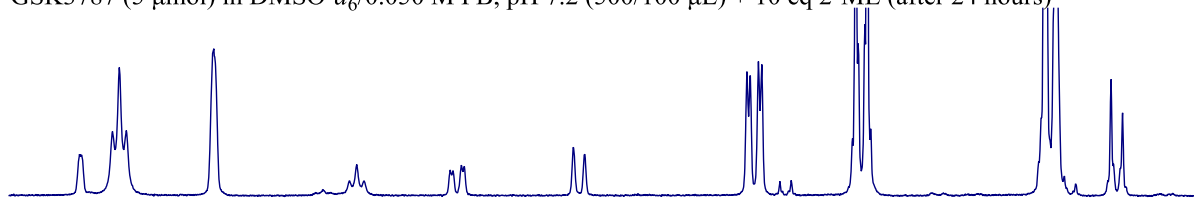

2-((5-(trifluoromethyl)pyridin-2-yl)thio)ethan-1-ol (5  $\mu\text{mol}$ ) in DMSO- $d_6$ /0.050 M PB, pH 7.2 (500/100  $\mu\text{L}$ )

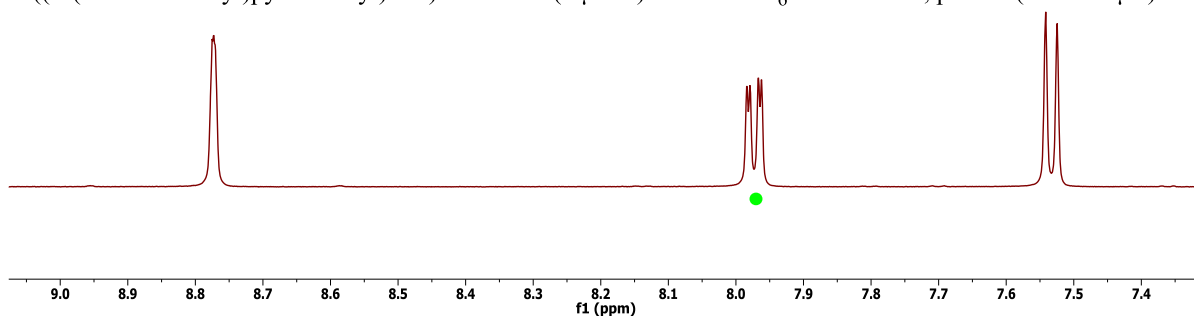

**Figure S5**  $^1\text{H}$  NMR monitoring (partial spectrum) of GSK3787 (1) treated with 2-ME (10 eq). The integrals of the signals marked with red and green spheres were followed for 24 hours (see Figure S8). The spectrum of the independently synthesized sulfide 2-((5-(trifluoromethyl)pyridin-2-yl)thio)ethan-1-ol (6) is shown at the bottom for comparison.

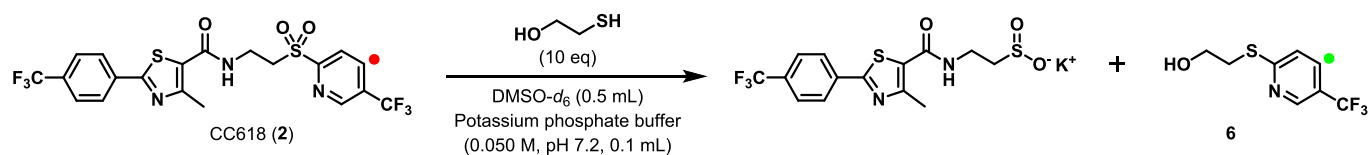

CC618 (5  $\mu\text{mol}$ ) in DMSO- $d_6$ /0.050 M PB, pH 7.2 (500/100  $\mu\text{L}$ )

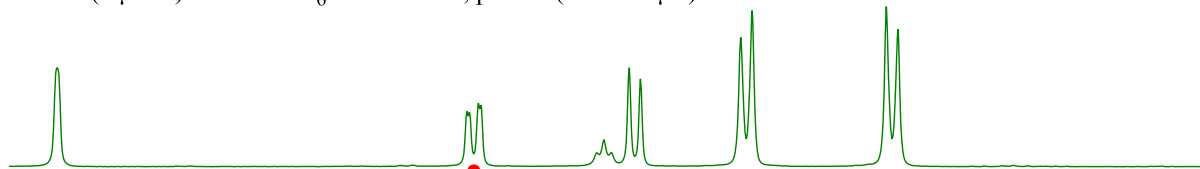

CC618 (5  $\mu\text{mol}$ ) in DMSO- $d_6$ /0.050 M PB, pH 7.2 (500/100  $\mu\text{L}$ ) + 10 eq 2-ME (after 24 hours)

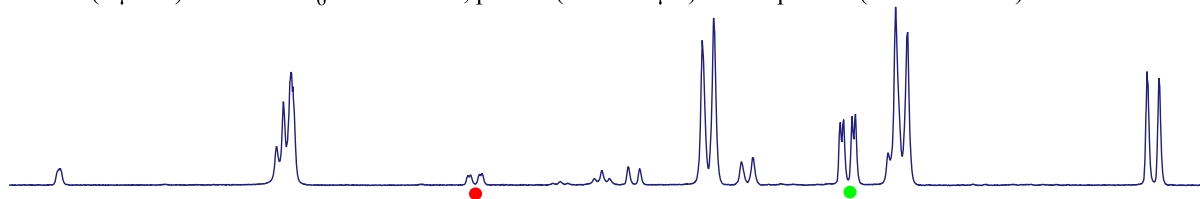

2-((5-(trifluoromethyl)pyridin-2-yl)thio)ethan-1-ol (5  $\mu\text{mol}$ ) in DMSO- $d_6$ /0.050 M PB, pH 7.2 (500/100  $\mu\text{L}$ )

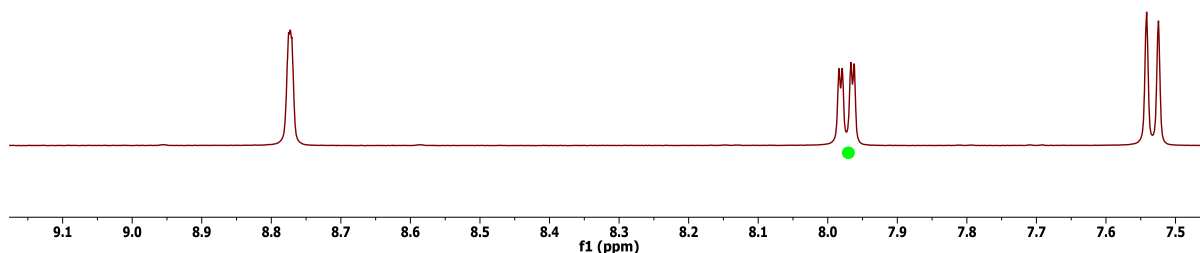

**Figure S6**  $^1\text{H}$  NMR monitoring (partial spectrum) of CC618 (2) treated with 2-ME (10 eq). The integrals of the signals marked with red and green spheres were followed for 24 hours (see Figure S8). The spectrum of the independently synthesized sulfide 2-((5-(trifluoromethyl)pyridin-2-yl)thio)ethan-1-ol (6) is shown at the bottom for comparison.

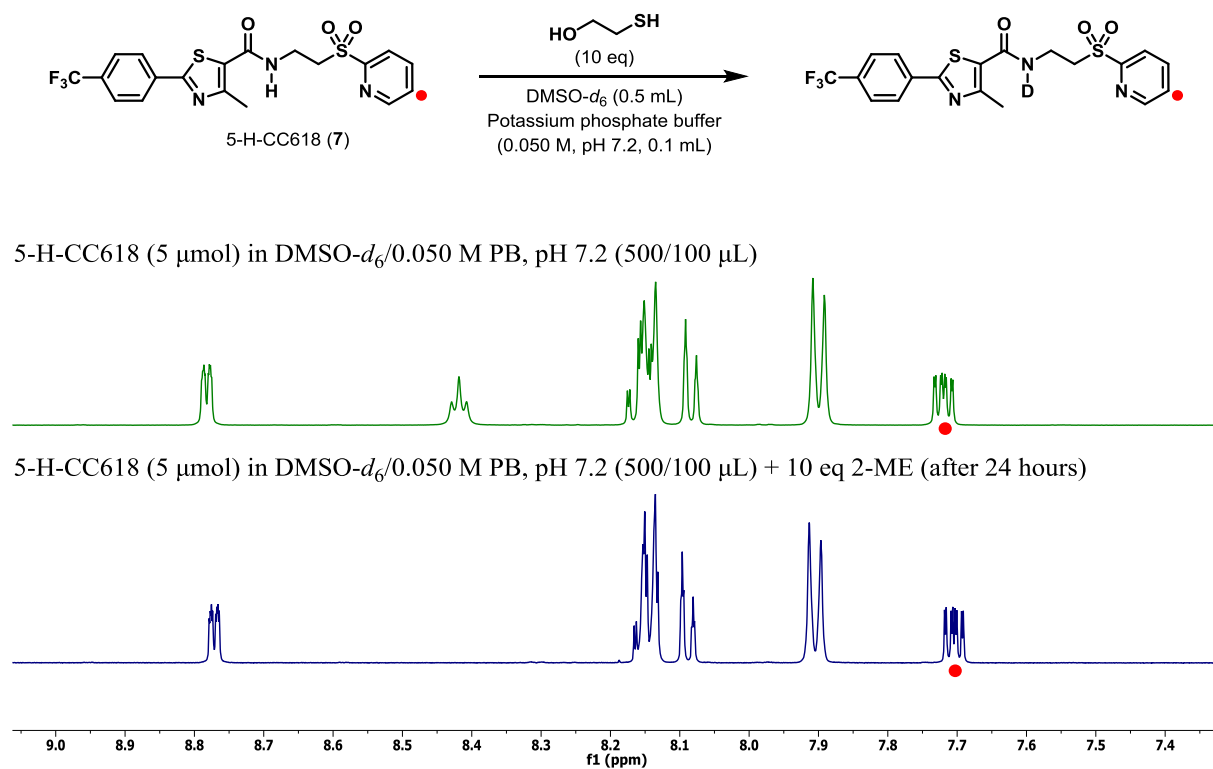

**Figure S7** <sup>1</sup>H NMR monitoring (partial spectrum) of 5-H-CC618 (**7**) treated with 2-ME (10 eq). The integrals of the signal marked with a red sphere were followed for 24 hours (see Figure S8).

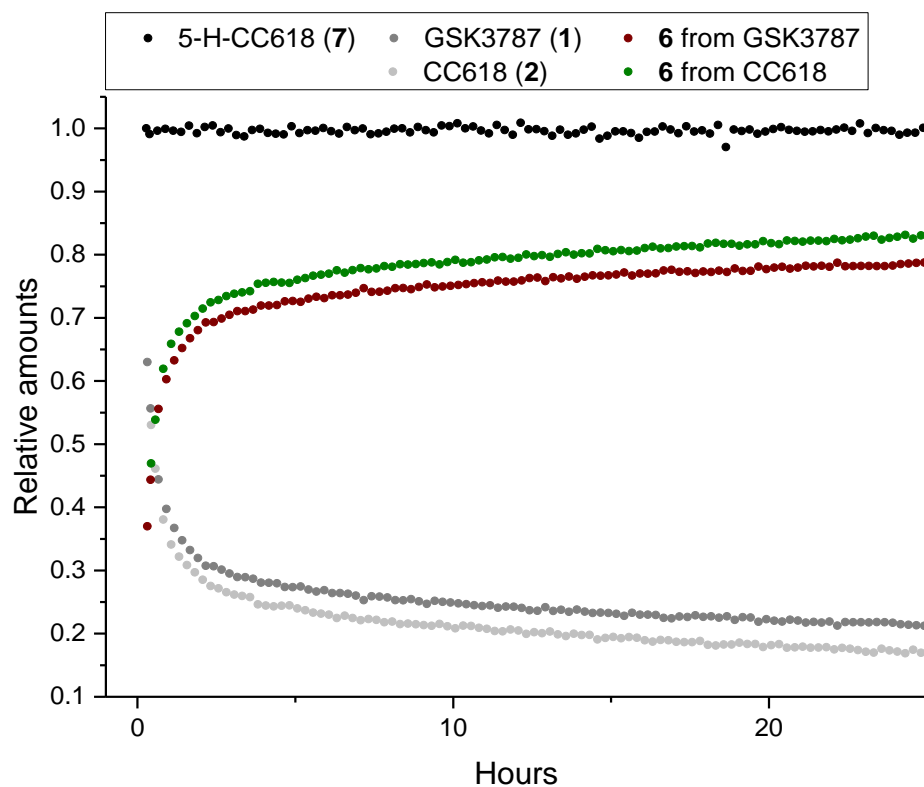

**Figure S8** Starting materials (**1**, **2** or **7**) and the produced sulfide 2-((5-(trifluoromethyl)pyridin-2-yl)thio)ethan-1-ol (**6**), as observed by  $^1\text{H}$  NMR spectroscopy, upon treatment of GSK3787 (**1**), CC618 (**2**) or 5-H-CC618 (**7**) with 2-ME (10 eq) in  $\text{DMSO-}d_6$ /potassium phosphate buffer (0.050 M, pH 7.2).

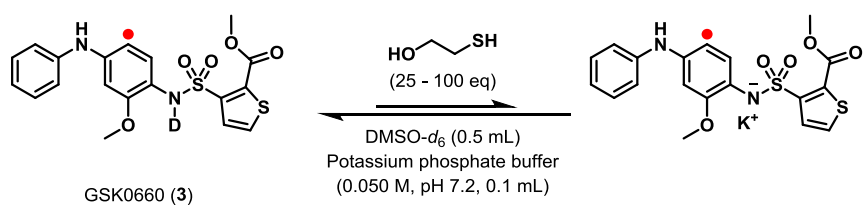

GSK0660 (2.25  $\mu$ mol) in DMSO-*d*<sub>6</sub>/PB (500/100  $\mu$ L)

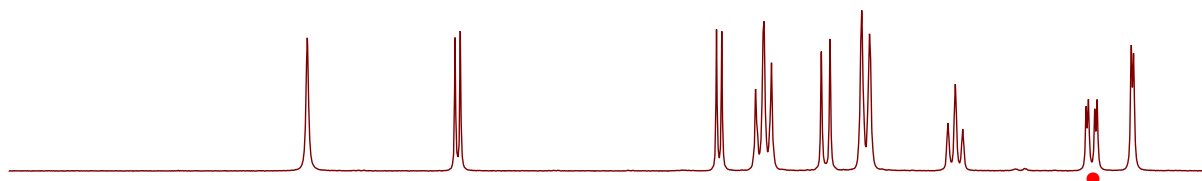

GSK0660 (2.25  $\mu$ mol) in DMSO-*d*<sub>6</sub>/PB (500/100  $\mu$ L) + 25 eq 2-ME (after 24 hours)

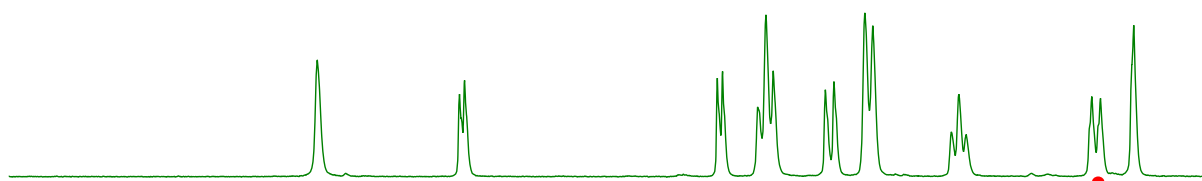

GSK0660 (2.25  $\mu$ mol) in DMSO-*d*<sub>6</sub>/PB (500/100  $\mu$ L) + 100 eq 2-ME (after 48 hours)

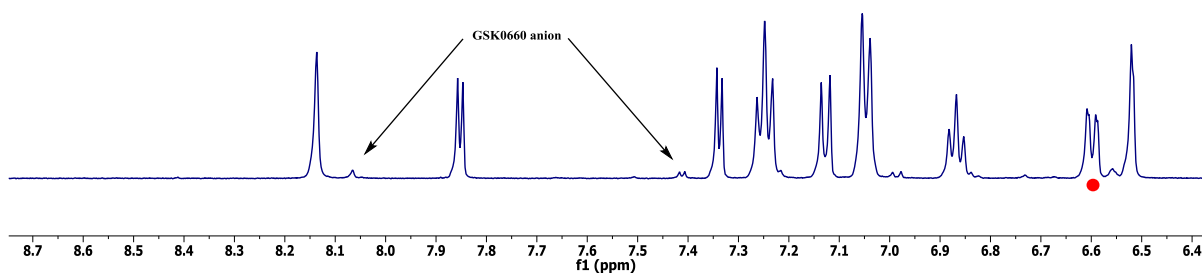

**Figure S9** <sup>1</sup>H NMR monitoring (partial spectrum) of GSK0660 (**3**) treated with 2-ME (25 or 100 eq). The integrals of the signal marked with a red sphere were followed for 24 or 48 hours (see Figure S10).

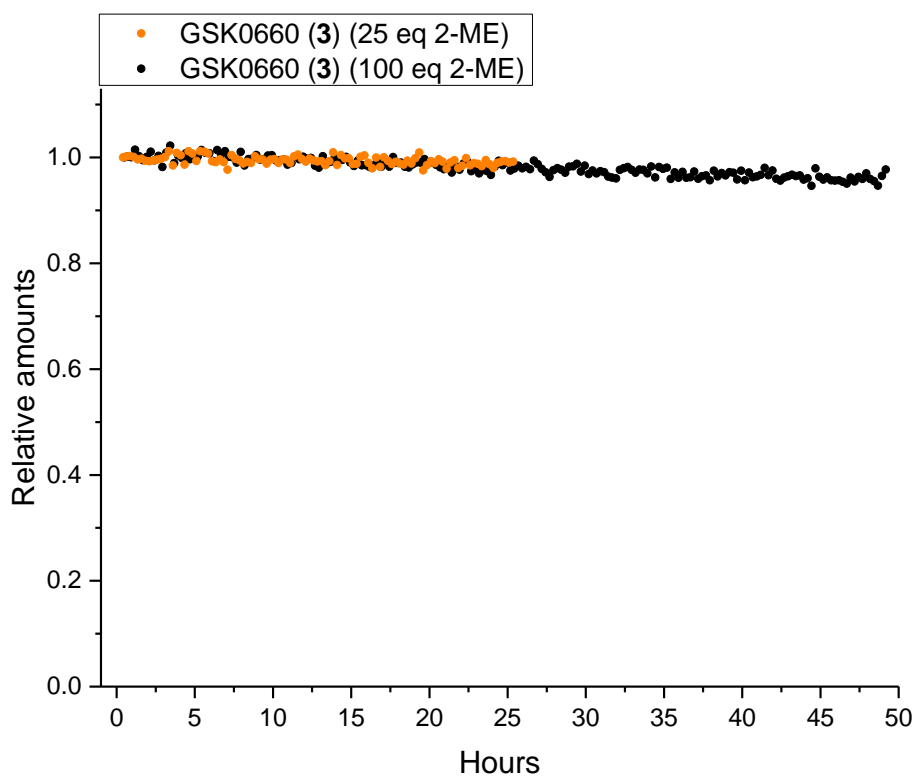

**Figure S10** GSK0660 (**3**), as observed by  $^1\text{H}$  NMR spectroscopy, upon treatment with 2-ME (25 or 100 eq) in  $\text{DMSO-}d_6$ /0.050 M potassium phosphate buffer. The integrals of the signals from the protons marked with red spheres in Figure S9 were followed for 24 – 48 hours.

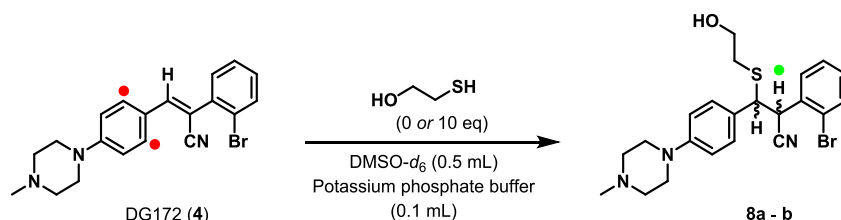

**A** DG172•HCl in DMSO-*d*<sub>6</sub>/1.0 M PB, pH<sub>PB</sub> 7.2 (500/100 μL)

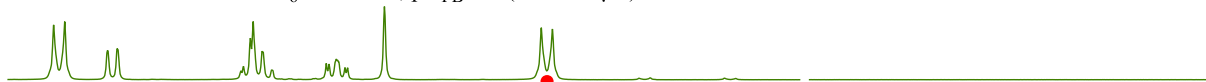

**B** DG172•HCl in DMSO-*d*<sub>6</sub>/1.0 M PB, pH<sub>PB</sub> 7.2 (500/100 μL) + 10 eq 2-ME (after 24 hours)

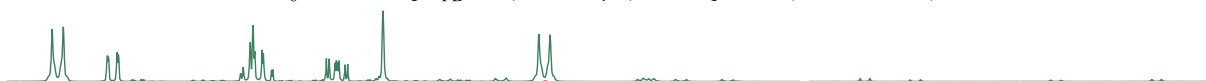

**C** DG172•HCl in DMSO-*d*<sub>6</sub>/1.0 M PB, pH<sub>PB</sub> 7.5 (500/100 μL) + 10 eq 2-ME (after 24 hours)

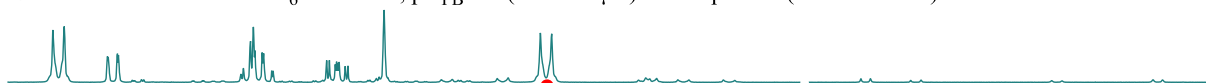

**D** DG172•HCl in DMSO-*d*<sub>6</sub>/1.0 M PB, pH<sub>PB</sub> 7.8 (500/100 μL) + 10 eq 2-ME (after 24 hours)

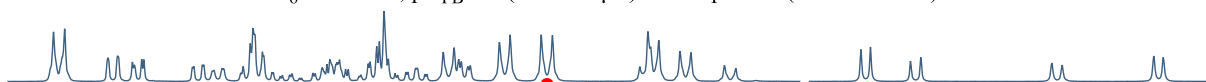

**E** DG172•HCl in DMSO-*d*<sub>6</sub>/1.0 M PB, pH<sub>PB</sub> 8.1 (500/100 μL) + 10 eq 2-ME (after 24 hours)

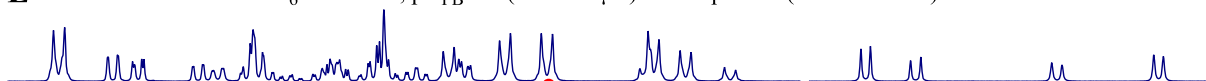

**F** DG172 in DMSO-*d*<sub>6</sub>/0.050 M PB, pH<sub>PB</sub> 7.2 (500/100 μL) + 10 eq 2-ME (after 24 hours)

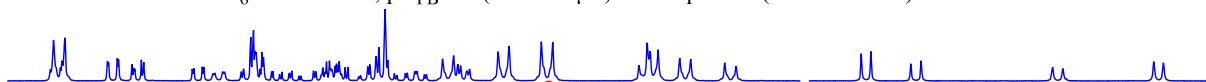

7.9 7.8 7.7 7.6 7.5 7.4 7.3 7.2 7.1 7.0 6.9 6.8 6.7 6.6 6.5 6.4 6.3 6.2 6.1 6.0 5.9 5.8 5.7 5.6 5.5 5.4 5.3 5.2 5.1 5.0 4.9 4.8 4.7 4.6 4.5 4.4



| Buffer pH (1.0 M) | DG172 ( <b>4</b> ) | DG172-2-ME adducts ( <b>8a-b</b> ) |
|-------------------|--------------------|------------------------------------|
| 7.2               | 0.903              | 0.097                              |
| 7.5               | 0.879              | 0.121                              |
| 7.8               | 0.403              | 0.597                              |
| 8.1               | 0.400              | 0.600                              |

**Table S3** Extent of formation of DG172-2-ME adducts (**8a – b**) upon treatment of DG172·HCl (**4·HCl**) with 2-ME (10 eq) for 24 hours at pH 7.2, 7.5, 7.8 and 8.1, as described in Figure S11. The values were obtained from single experiments and were normalized from the absolute integrals of comparable peaks in starting material and product (red and green spheres in **B – E** in Figure S11), here given as their ratio.

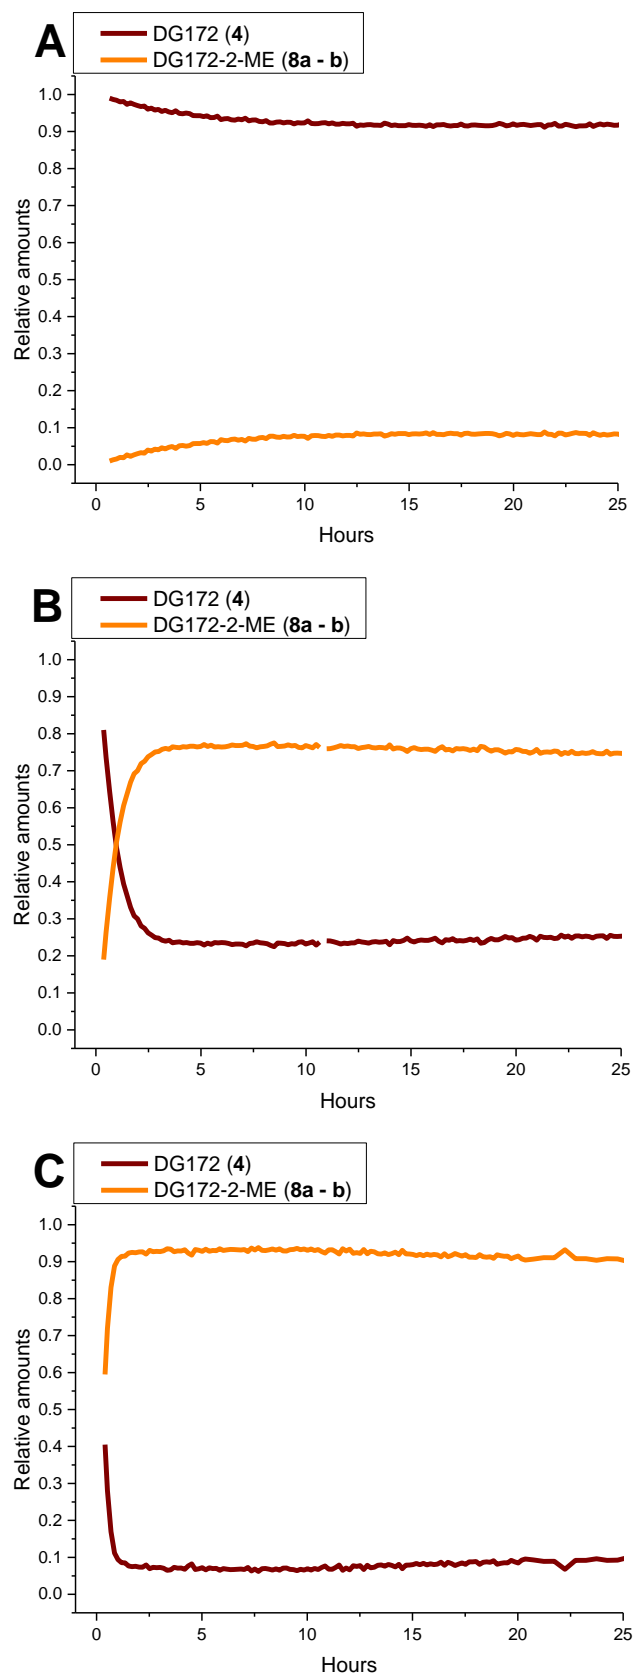

**Figure S12** DG172 (**4**) and the DG172-2-ME adducts (**8a – b**), as observed by  $^1\text{H}$  NMR spectroscopy, upon treatment with 2-ME in  $\text{DMSO-}d_6/0.050\text{ M}$  potassium phosphate buffer. **A:** 2-ME (1 eq), **B:** 2-ME (25 eq), **C:** 2-ME (100 eq). The integrals of the signals from the protons marked with red and green spheres in Figure S11 were followed for 24 hours.

## UV-SPECTROSCOPY AND $pK_A$ -CALCULATIONS

The possibility for reversal of the 1,4-conjugate addition reaction to DG172 (**4**) was investigated. Although other factors may be involved in facilitating the reverse reaction,<sup>10</sup> the intrinsic reversibility of the 1,4-conjugate addition can manifest itself when the stability of the intermediate  $\alpha$ -carbanion (reflected in the acidity of the  $\alpha$ -proton of the adduct) is sufficient for the  $\alpha$ -proton to be lost to solution (here an aqueous solution at pH 7.2). Subsequently, the  $\alpha,\beta$ -unsaturated double bond may reform, with elimination of the nucleophile (here, a thiolate).<sup>10–13</sup> Taking cues from an elegant UV-study on the reversibility of the addition of 2-ME to a series of RSK2-inhibitors, containing highly activated conjugate acceptor motifs,<sup>14</sup> we monitored the addition of 2-ME to DG172 (**4**) in potassium phosphate buffer. We observed a significant decrease in the acrylonitrile absorption peak upon addition of 2-ME (1024 eq) to DG172 (150  $\mu$ M) in 0.050 M potassium phosphate buffer (3.0 mL). Following tenfold dilution, the reappearance of the acrylonitrile absorption was monitored at fixed intervals during the course of 72 hours. The obtained data indicate that the addition of 2-ME to DG172 (**4**) is slowly reversible under these conditions (see Figure S13). The 2-ME adduct of DG172 is, however, isolable (see synthesis and isolation below), in contrast to the adducts of other highly activated conjugate acceptors, sought isolated in previous work.<sup>10</sup> In the work on RSK2 kinase inhibitors,<sup>14</sup> the mode of action the ligands was established as a synergistic combination of non-covalent interactions and reversible, covalent binding. Their UV-study of the 1,4-conjugate additions of 2-ME in PBS to these structures, demonstrated that the adducts reverted to the starting materials within seconds of dilution, as observed by the reappearance of the acrylonitrile UV-absorption peak. Consequently, their putative RSK2-adducts could not be detected by protein LC-MS.

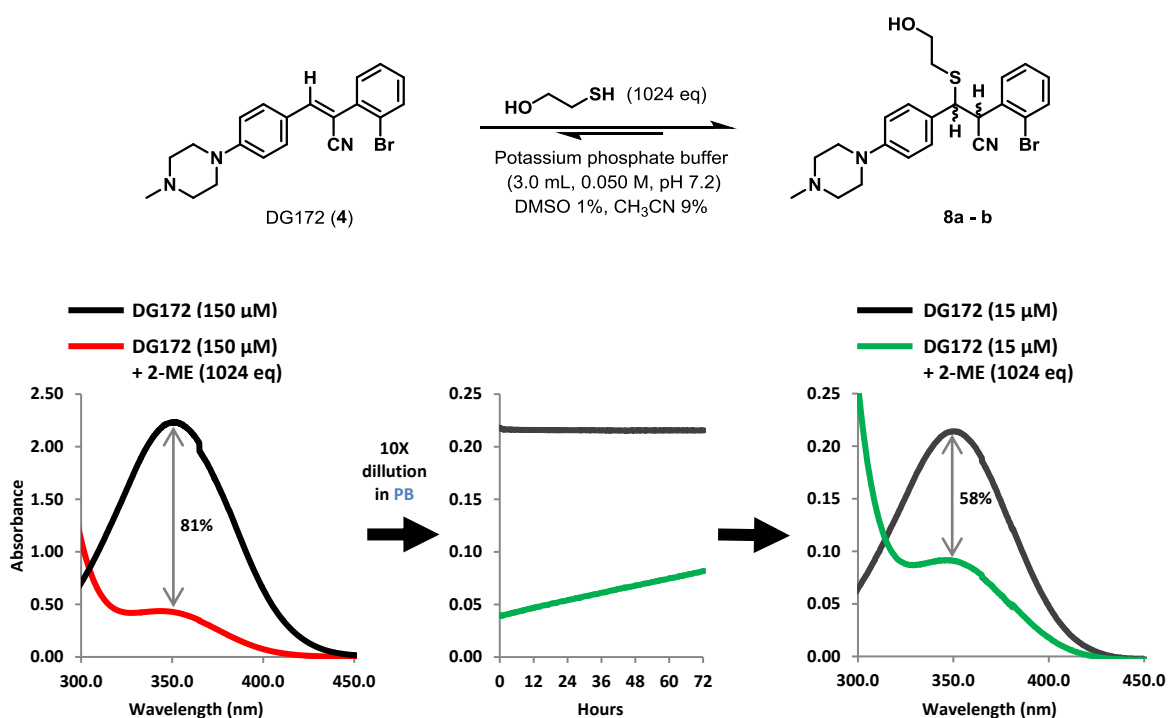

**Figure S13** Dilution of a solution of DG172 (**4**), treated with 2-ME (1024 eq), results in the slow reversal of the 1,4-conjugate addition and reformation of the acrylonitrile moiety, over the course of 72 hours. The percentages shown between the curves refer to the extent of reduction of the acrylonitrile absorption peak of the treated solution, relative to the absorption peak of the untreated solution.

Interestingly, a series of less activated  $\alpha,\beta$ -unsaturated analogues did produce observable adducts, strongly suggesting that, given the structural similarity of these RSK2-inhibitors, the reversibility of the conjugate addition

could account for the lack of observable adducts.<sup>14</sup> In order to evaluate the addition of 2-ME to DG172 (**4**) in this context, we calculated the  $pK_a$ 's of the 2-ME adducts of the reported RSK2 inhibitors, as well as that of the DG172-2-ME adducts (**8a – b**). As can be seen from Table S3, the calculated  $pK_a$  of the DG172-2-ME adducts (**8a – b**) lies closer to those calculated for the adducts of compound “14” and compound “15”, which did not produce RSK2-adducts observable by LC-MS.

| Compound                                | $pK_a$ <sup>15</sup>                                                                        | Protein adduct found by LC-MS |
|-----------------------------------------|---------------------------------------------------------------------------------------------|-------------------------------|
| Compound “12”-2-ME adduct <sup>14</sup> | 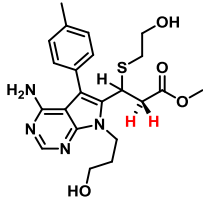<br>24.90  | Yes                           |
| Compound “13”-2-ME adduct <sup>14</sup> | <br>24.87  | Yes                           |
| DG172-2-ME adduct ( <b>8a – b</b> )     | <br>13.35 | No                            |
| Compound “14”-2-ME adduct <sup>14</sup> | <br>8.65 | No                            |
| “Compound 15”-2-ME adduct <sup>14</sup> | <br>7.72 | No                            |

**Table S4** Calculated  $pK_a$ 's of 2-ME adducts of reported RSK2-inhibitors<sup>14</sup> compared with that of the DG172-2-ME adducts (**8a – b**).

## OFF-RATE MEASUREMENTS WITH TR-FRET

The competitive ligand binding assay kit was reconfigured for use in off-rate measurements as previously described for work involving kinases.<sup>15–17</sup>

Tb-anti-GST and GST-PPAR $\beta/\delta$  were thawed on ice and added to the supplied assay buffer (20  $\mu$ L) to a (2X) concentration of 500 nM and 200 nM, respectively. The solution was mixed by gentle inversion. 2  $\mu$ L of this solution was added to each assay well. Ligand solutions (2X concentration) were prepared in the supplied assay buffer and 2  $\mu$ L of each of these solutions were added into the drop of protein solution in each assay well. The wells were sealed and incubated for 1 hour in the dark, prior to 50 times dilution with a solution containing an excess of the tracer ligand (100 nM). The final volume was 200  $\mu$ L in all wells. The plate was then read at multiple time-points, to monitor the development of an eventual FRET signal. The final concentrations of Tb-anti-GST, GST-PPAR $\beta/\delta$ , ligands and DMSO were as noted in Table S5. A high concentration (10  $\mu$ M) of GW501516 (**5**) was used as a positive control (Entry 1, Table S5) and DMSO (final concentration 2%v/v) as the negative control.

| Entry | Compound                            | During protein treatment |                                                     | After dillution                    |                        |                   |           |
|-------|-------------------------------------|--------------------------|-----------------------------------------------------|------------------------------------|------------------------|-------------------|-----------|
|       |                                     | Ligand conc. (nM)        | Ligand conc. vs. IC <sub>50</sub> (eq) <sup>a</sup> | GST-PPAR $\beta/\delta$ conc. (nM) | Tb-anti-GST conc. (nM) | Ligand conc. (nM) | DMSO %v/v |
| 1     | GW501516 ( <b>5</b> ) <sup>18</sup> | 10000                    | 6667 <sup>b</sup>                                   | 2                                  | 5                      | 200               | 2         |
| 2     | GW501516 ( <b>5</b> )               | 100                      | 67 <sup>b</sup>                                     | 2                                  | 5                      | 2                 | 2         |
| 3     | DG172 ( <b>4</b> ) <sup>9</sup>     | 2000                     | 67 <sup>c</sup>                                     | 2                                  | 5                      | 40                | 2         |
| 4     | DG172 ( <b>4</b> )                  | 300                      | 10 <sup>c</sup>                                     | 2                                  | 5                      | 6                 | 2         |
| 5     | GSK3787 ( <b>1</b> ) <sup>1</sup>   | 6500                     | 10 <sup>d</sup>                                     | 2                                  | 5                      | 130               | 2         |

<sup>a</sup>The equivalents shown are rounded off to the nearest integer for ease of interpretation.

<sup>b</sup>The IC<sub>50</sub> value of GW501516 (1.5 nM) in the competitive ligand binding configuration of this assay is previously reported.<sup>4</sup>

<sup>c</sup>The IC<sub>50</sub> value of DG172 (26.9 nM) in the competitive ligand binding configuration of this assay is previously reported.<sup>9</sup> We obtained a similar value (32.7 nM, data not shown) and the average of these values (29.8 nM) was used in the calculation in Table S4.

<sup>d</sup>The IC<sub>50</sub> of GSK3787 (648 nM) in the competitive ligand binding configuration of this assay was calculated from measurements taken after 1 hour of incubation (data not shown).

**Table S5** Experimental details from the off-rate measurements monitored by TR-FRET.

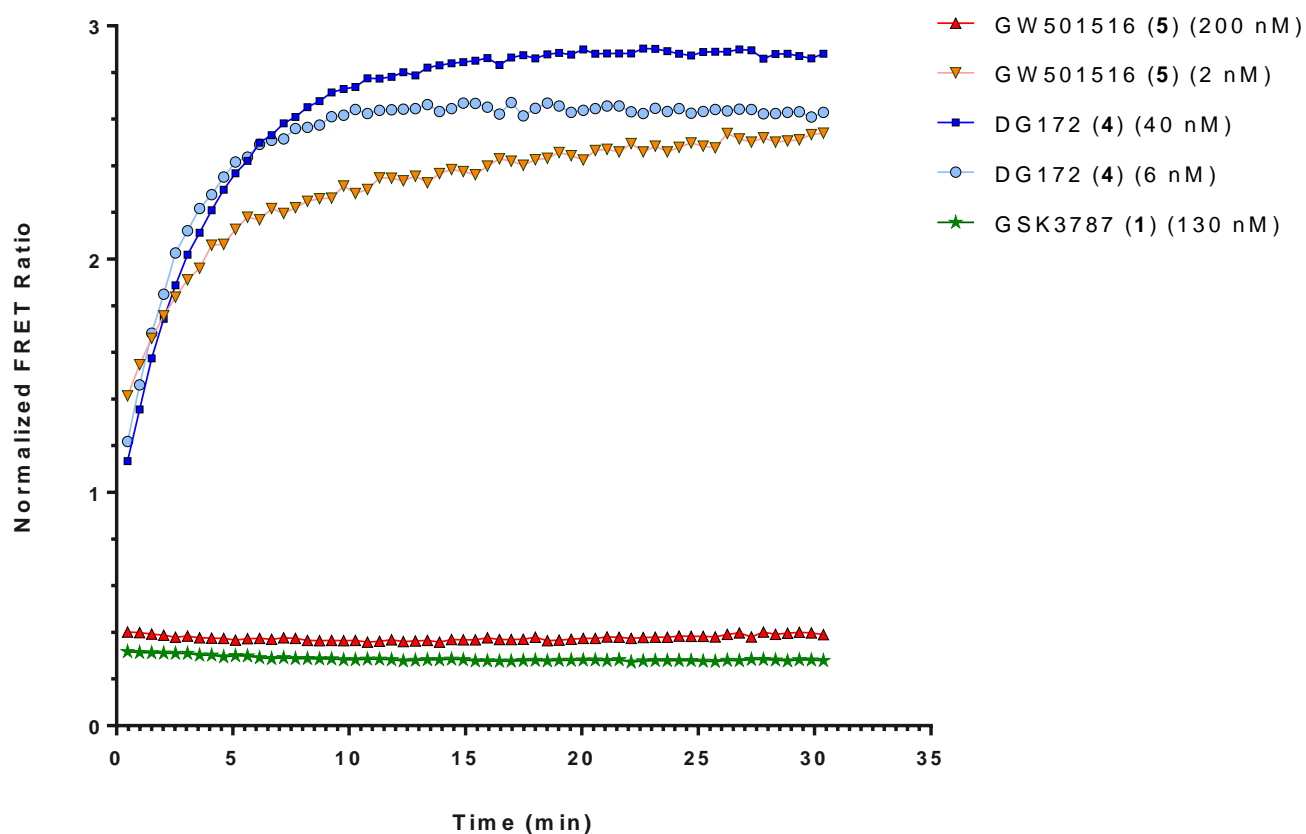

**Figure S14** Displacement of ligands 1, 4 and 5 from the LBP of PPAR $\beta/\delta$  by the fluorescent tracer ligand Fluormone Pan PPAR Green (100 nM) as a function of time. The normalized FRET ratio represents values from single wells, normalized based on control wells (DMSO, n = 2). The concentrations in parentheses refer to the final concentrations of the ligands after dilution.

## SYNTHETIC CHEMISTRY

### Synthesis of identified products:

#### 2-((5-(trifluoromethyl)pyridin-2-yl)thio)ethan-1-ol (**6**)<sup>19</sup>

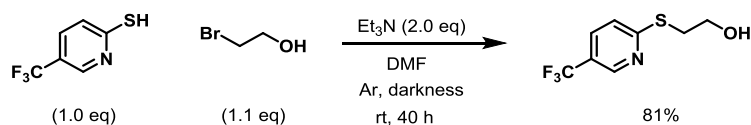

To a stirred solution of 5-(trifluoromethyl)-pyridine-2-thiol (97%, 0.092 g, 0.50 mmol, 1.0 eq) in DMF (5 mL), at ambient temperature under an argon atmosphere, was added 2-bromoethanol (95%, 41  $\mu\text{L}$ , 0.55 mmol, 1.1 eq), followed by  $\text{Et}_3\text{N}$  ( $\geq 99\%$ , 139  $\mu\text{L}$ , 1.00 mmol, 2.0 eq). The flask was capped with a septum, flushed with argon and the reaction was stirred, in the dark, for 40 hours. The mixture was then diluted with  $\text{H}_2\text{O}$  (10 mL), extracted with EtOAc (3 x 20 mL) and the combined organic phases were washed with saturated aqueous NaCl (5 x 10 mL). The organic phase was dried over anhydrous  $\text{Na}_2\text{SO}_4$  and evaporated under reduced pressure, at or below 40  $^\circ\text{C}$ , leaving a pale yellow oil (0.107 g). A fritted, 3 cm x 3 cm  $\varnothing$  column of silica gel was packed in heptane, the crude product was dissolved in a minimal amount of  $\text{CH}_2\text{Cl}_2$  and loaded onto the column. The  $\text{CH}_2\text{Cl}_2$  was evaporated under a stream of argon, followed by elution of the column with heptane (50 mL) and EtOAc:heptane/5:95 (400 mL). Finally, the product was eluted with EtOAc:heptane/10:90 (250 mL) and the solvents evaporated under reduced pressure, at or below 40  $^\circ\text{C}$ , leaving a clear oil (0.093 g, 81%).

**$^1\text{H}$  NMR** (300 MHz,  $\text{CDCl}_3$ )  $\delta$  8.68 – 8.60 (m, 1H), 7.76 – 7.66 (m, 1H), 7.42 – 7.32 (m, 1H), 3.95 (dd,  $J = 5.9, 5.2$  Hz, 2H), 3.66 (s, 1H), 3.42 (dd,  $J = 5.9, 5.2$  Hz, 2H).

**$^{13}\text{C}$  NMR** (75 MHz,  $\text{CDCl}_3$ )  $\delta$  164.0 (q,  $J = 1.4$  Hz), 145.9 (q,  $J = 4.3$  Hz), 133.3 (q,  $J = 3.4$  Hz), 123.6 (q,  $J = 271.8$  Hz), 123.0 (q,  $J = 33.5$  Hz), 122.5, 62.8, 33.8.

**MS (EI)**  $m/z$  (%) 223 (11) [ $\text{M}]^+$ , 204 (90), 192 (68), 179 (100), 160 (5), 146 (47), 135 (41), 126 (14), 75 (6), 69 (10), 45 (9).

**HRMS (EI)** calcd. for  $\text{C}_8\text{H}_8\text{F}_3\text{NOS}$ : 223.027871; found: 223.027281(+ 2.6 ppm).

**2-(2-bromophenyl)-3-((2-hydroxyethyl)thio)-3-(4-(4-methylpiperazin-1-yl)phenyl)propanenitrile (8a - b)**

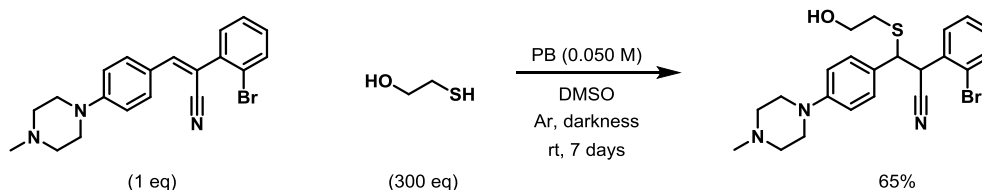

To a stirred solution of (Z)-2-(2-bromophenyl)-3-(4-(4-methylpiperazin-1-yl)phenyl)acrylonitrile (DG172, **4**)<sup>9</sup> (0.038 g, 0.10 mmol, 1.0 eq) in DMSO (6.5 mL), at ambient temperature under an argon atmosphere, was added 2-mercaptoethanol (2-ME) (2.1 mL, 30.0 mmol, 300 eq), followed by potassium phosphate buffer (PB) (0.050 M, pH 7.2, 1.5 mL). The flask was capped with a septum, flushed with argon and the reaction was stirred at ambient temperature, in the dark, for 7 days. The mixture was then diluted with H<sub>2</sub>O (20 mL) and EtOAc (20 mL) and transferred to a separatory funnel, where the organic phase was separated and the aqueous phase further extracted with EtOAc (2 x 20 mL). The combined organic phases were washed with a 1:3 mixture of NaHCO<sub>3</sub> (aq. sat.) and H<sub>2</sub>O (3 x 20 mL) and then with brine (7 x 20 mL), before drying over anhydrous Na<sub>2</sub>SO<sub>4</sub>. The solvent was evaporated under reduced pressure, at or below 40 °C, and the crude material redissolved in a minimal amount of CH<sub>2</sub>Cl<sub>2</sub>, before loading it onto a fritted, 4.5 cm x 3 cm Ø column of silica gel, packed in CH<sub>2</sub>Cl<sub>2</sub>. The column was eluted with CH<sub>2</sub>Cl<sub>2</sub> (70 mL), CH<sub>3</sub>OH:CH<sub>2</sub>Cl<sub>2</sub>/1:99 (200 mL), CH<sub>3</sub>OH:CH<sub>2</sub>Cl<sub>2</sub>/2:98 (500 mL) and finally with CH<sub>3</sub>OH:CH<sub>2</sub>Cl<sub>2</sub>/5:95 (450 mL) to elute the product fractions containing both diastereomers. Evaporation of the solvents under reduced pressure, at or below 40 °C, afforded a colourless foam (0.030 g, 65%).

**Major diastereomer:**

<sup>1</sup>H NMR (600 MHz, CDCl<sub>3</sub>) δ 7.60 – 7.55 (m, 1H), 7.18 – 7.12 (m, 1H), 7.14 – 7.09 (m, 1H), 7.06 (d, *J* = 8.5 Hz, 1H), 6.92 (dd, *J* = 7.5, 1.9 Hz, 1H), 6.77 (d, *J* = 8.6 Hz, 1H), 4.86 (d, *J* = 5.5 Hz, 1H), 4.23 (d, *J* = 5.5 Hz, 1H), 3.66 (td, *J* = 5.9, 2.4 Hz, 2H), 3.19 (t, *J* = 5.1 Hz, 4H), 2.74 (dt, *J* = 13.9, 6.0 Hz, 1H), 2.68 (dt, *J* = 13.7, 5.9 Hz, 1H), 2.57 (q, *J* = 5.0 Hz, 6H), 2.34 (s, 3H).

<sup>13</sup>C NMR (151 MHz, CDCl<sub>3</sub>) δ 151.2, 133.4, 133.1, 130.7, 130.2, 129.7, 127.9, 126.5, 123.3, 118.3, 115.5, 60.8, 55.1, 50.5, 48.6, 46.2, 44.9, 35.2.

**Minor diastereomer:**

<sup>1</sup>H NMR (600 MHz, CDCl<sub>3</sub>) δ 7.69 (dd, *J* = 7.8, 1.7 Hz, 1H), 7.58 – 7.54 (m, 1H), 7.40 (d, *J* = 8.6 Hz, 2H), 7.40 – 7.34 (m, 1H), 7.21 (td, *J* = 7.7, 1.6 Hz, 1H), 6.87 (d, *J* = 8.7 Hz, 2H), 4.69 (d, *J* = 5.0 Hz, 1H), 4.25 (d, *J* = 5.1 Hz, 1H), 3.51 – 3.44 (m, 1H), 3.47 – 3.40 (m, 1H), 3.23 – 3.21 (m, 4H), 2.59 – 2.54 (m, 10H), 2.49 – 2.44 (m, 1H), 2.44 – 2.38 (m, 1H), 2.35 (s, 4H).

<sup>13</sup>C NMR (151 MHz, CDCl<sub>3</sub>) δ 151.1, 133.6, 133.0, 131.2, 130.4, 129.4, 128.8, 128.0, 123.2, 118.4, 115.9, 60.7, 55.1, 51.6, 48.6, 46.2, 45.8, 35.6.

**Mixture:**

**MS (EI)** *m/z* (%) 461/459 (1/1) [M]<sup>+</sup>, 384/383/382/381 (13/23/14/22), 265 (100), 203 (11), 71/70 (11/11), 43 (16).

**HRMS (EI)** calcd. for C<sub>22</sub>H<sub>26</sub>BrN<sub>3</sub>OS: 459.097996; found: 459.096948 (+ 2.3 ppm).



## Synthesis of starting materials:

### 4-(4-methylpiperazin-1-yl)benzaldehyde (**9**)<sup>20,21</sup>

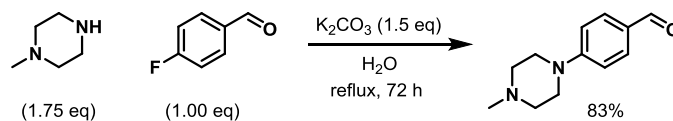

4-Fluorobenzaldehyde (98%, 0.55 mL, 5.03 mmol, 1.00 eq) was added dropwise to a stirred solution of 1-methylpiperazine (0.97 mL, 8.73 mmol, 1.75 eq) and  $K_2CO_3$  (1.044 g, 7.55 mmol, 1.50 eq) in  $H_2O$  (5 mL), at ambient temperature and the flask was fitted a reflux condenser. The flask was placed in a glycerol bath which was heated to 102 °C. The reaction was stirred for 72 hours, allowed to cool to ambient temperature and then partitioned between  $H_2O$  (20 mL) and  $CH_2Cl_2$  (20 mL). The aqueous phase was extracted with  $CH_2Cl_2$  (2 x 20 mL) and the combined organic phases washed with  $H_2O$  (2 x 20 mL), brine (20 mL) and then dried over anhydrous  $Na_2SO_4$ . Evaporation of the solvent under reduced pressure, at or below 35 °C, afforded a pale yellow solid. This material was redissolved in  $CH_2Cl_2$ , added silica gel (1 tbs) and the solvent evaporated under reduced pressure, at or below 35 °C. The resulting material was loaded onto a short silica gel column (1 tbs, 3 cm  $\varnothing$ ), packed in  $CH_2Cl_2$ , and the column was eluted with  $CH_2Cl_2$  (100 mL), followed by  $CH_3OH:CH_2Cl_2/10:90$  to elute the product. Evaporation of the solvents under reduced pressure, at or below 35 °C, furnished the product as a pale yellow solid (0.851 g, 83%), which was reasonably pure by TLC and NMR-analyses. The spectral data were in accordance with the reported.<sup>20</sup>

**<sup>1</sup>H NMR** (400 MHz,  $CDCl_3$ )  $\delta$  9.77 (bs, 1H), 7.74 (app d,  $J$  = 8.9 Hz, 2H), 6.90 (app d,  $J$  = 8.9 Hz, 2H), 3.44 – 3.36 (m, 4H), 2.56 – 2.49 (m, 4H), 2.34 (bs, 3H).

**<sup>13</sup>C NMR** (101 MHz,  $CDCl_3$ )  $\delta$  190.5, 155.1, 131.9, 127.2, 113.6, 54.8, 47.2, 46.2.

**(Z)-2-(2-bromophenyl)-3-(4-(4-methylpiperazin-1-yl)phenyl)acrylonitrile (DG172, 4)<sup>9</sup>**

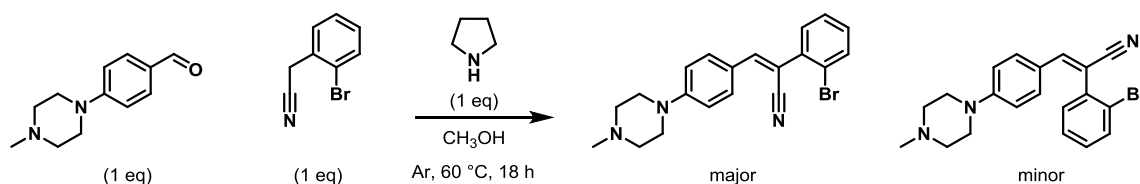

To a solution of 4-(4-methylpiperazin-1-yl)benzaldehyde (0.500 g, 2.45 mmol, 1.0 eq) in CH<sub>3</sub>OH (4 mL), at ambient temperature in an air atmosphere, was added pyrrolidine (0.20 mL, 2.45 mmol, 1.0 eq). The resulting orange solution was stirred for 5 minutes before adding 2-bromophenylacetonitrile (97%, 328  $\mu$ L, 2.45 mmol, 1.0 eq). The flask was fitted with a reflux cooler capped with a septum and the system was evacuated with argon. The flask was then lowered into a glycerol bath at 60 °C and stirred for 18 hours. TLC analysis at this point indicated that the reaction had proceeded to approximately 50% completion. Nevertheless,  $\frac{1}{4}$  of the reaction mixture (1 mL) was removed and evaporated onto silica gel (3 g), under reduced pressure, at or below 30 °C. The resulting dry material was loaded onto a 13 cm x 4 cm  $\varnothing$  column of silica gel (80 g), which had been packed dry and equilibrated with CH<sub>2</sub>Cl<sub>2</sub>. The column was then eluted with CH<sub>3</sub>OH:CH<sub>2</sub>Cl<sub>2</sub>/0:100 - 2:98 (30 min) and then CH<sub>3</sub>OH:CH<sub>2</sub>Cl<sub>2</sub>/2:98 (50 min) to apparently elute a single yellow band. The fractions were combined and the solvents removed under reduced pressure, at or below 30 °C, to leave a yellow oil. TLC analysis (5 elutions in CH<sub>3</sub>OH:CH<sub>2</sub>Cl<sub>2</sub>/5:95) of this material, indicated that the reaction had proceeded with near complete selectivity for the *Z*-isomer (the *E*-isomer is seen as a close-running spot of slightly higher *R<sub>f</sub>*).

**MS(EI)** *m/z* (%) 384/383/382/381 (22/98/30/100), 339 (9), 313/312/311/310 (7/16/9/16), 298/296 (10/10), 203 (47), 71 (40), 70 (31), 43 (42).

**HRMS (EI)** calcd. for C<sub>20</sub>H<sub>20</sub>BrN<sub>3</sub>: 381.084059; found: 381.083817 (+ 0.6 ppm).

**(Z)-2-(2-bromophenyl)-3-(4-(4-methylpiperazin-1-yl)phenyl)acrylonitrile dihydrochloride (DG172·2HCl, 4·2HCl)<sup>9</sup>**

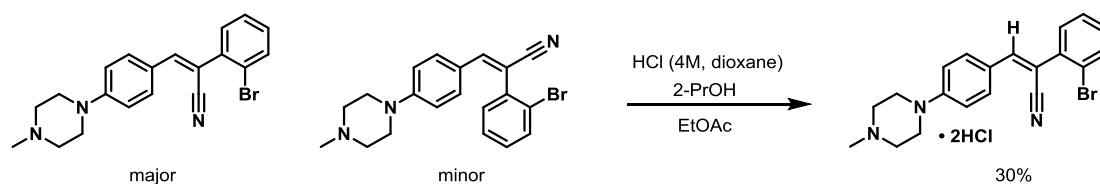

To obtain the *Z*-isomer exclusively, the procedure for making the dihydrochloride salt of DG172 (**4·2HCl**) was followed, essentially as reported:<sup>9</sup> To a stirred solution of EtOAc (30 mL) was added HCl in dioxane (5 mL, 4M). To the resulting solution, was added dropwise, the material isolated as described above, to give a clear solution. After 5 min, a white precipitate formed. The suspension was added 2-propanol (3 mL) and stirred for an additional 5 min, before filtering the suspension on a Büchner funnel with suction. The filter cake was washed repeatedly with aliquots of a solution of HCl in dioxane (1 mL, 4M) in EtOAc (10 mL). The filter paper, with the filter cake, was then transferred to a vial and the remaining solvents removed under reduced pressure, at or below 30 °C, to leave a nearly white powder (85 mg, 30% based on ¼ of reaction above) which was stored at 4 °C under an argon atmosphere.

**<sup>1</sup>H NMR** (600 MHz, DMSO, 25 °C)  $\delta$  11.47 (s, 1H), 7.88 (app d,  $J$  = 8.9 Hz, 2H), 7.75 (dd,  $J$  = 8.0, 1.2 Hz, 1H), 7.55 (dd,  $J$  = 7.7, 1.7 Hz, 1H), 7.50 (td,  $J$  = 7.5, 1.2 Hz, 1H), 7.40 (s, 1H), 7.38 (partial td,  $J$  = 7.5, 1.7 Hz, 1H), 7.15 (app d,  $J$  = 9.0 Hz, 1H), 5.68 (bs, 1H + H<sub>2</sub>O), 4.06 (app bd,  $J$  = 13.9 Hz, 2H), 3.47 (app bd,  $J$  = 11.9 Hz, 2H), 3.34 – 3.28 (m, 2H), 3.15 – 3.08 (m, 2H), 2.78 (d,  $J$  = 4.6 Hz, 3H).

**<sup>13</sup>C NMR** (151 MHz, DMSO, 25 °C)  $\delta$  151.1, 148.0, 136.4, 133.2, 131.6, 130.85, 130.79, 128.5, 123.6, 122.2, 118.0, 114.8, 104.8, 51.6, 44.1, 41.9.

**MS (ESI)**  $m/z$  (%) 385/384/383/382 (15/95/19/100).

**HPLC** (inj. vol. 5  $\mu$ L (1 mg/mL, H<sub>2</sub>O), eluent: 10% CH<sub>3</sub>CN, 60% CH<sub>3</sub>OH, 30% H<sub>2</sub>O/HCOOH (10 mM)) Retention time (%): 5.97 min (3 %, *E*-isomer), 10.07 min (97 %, *Z*-isomer).

**Notes:**

- 1) If left in air, the colour of the above obtained powder was observed to change to pale yellow, likely indicating the loss of HCl from the aniline-nitrogen to air-borne water and the subsequent formation of the mono-hydrochloride salt. The loss of HCl to the solvent is also apparent in the ESI-MS analysis of the dihydrochloride salt dissolved in CH<sub>3</sub>OH, in which only the singly protonated species is observed.
- 2) Chromatographical separation of the *Z*-isomer from the *E*-isomer proved difficult in our hands, but the *E*-isomer is obtainable by preparative TLC on a 25 x 25 cm aluminum-backed sheet of silica gel (0.250  $\mu$ m) of approximately 50 mg of material, using CH<sub>3</sub>CN as the eluent (multiple elutions). <sup>1</sup>H NMR (300 MHz, CDCl<sub>3</sub>)  $\delta$  7.73 – 7.68 (m, 1H), 7.44 – 7.24 (m, 3H), 7.29 (s, 1H), 3.29 – 3.23 (m, 4H), 2.53 – 2.48 (m, 4H), 2.33 (s, 3H).
- 3) A DMSO solution of the free amines (*E*- and *Z*-isomer) obtained by chromatography, as described above, was heated to 90 °C, in a glycerol bath, for a period of 72 hours. Subsequent <sup>1</sup>H NMR analysis of the solution showed an increased amount of the *E*-isomer. Thus, DG172 (**4**), as the free amine, might be unstable towards isomerization at elevated temperatures.

# NMR SPECTRA

## 2-((5-(trifluoromethyl)pyridin-2-yl)thio)ethan-1-ol (6)<sup>19</sup>

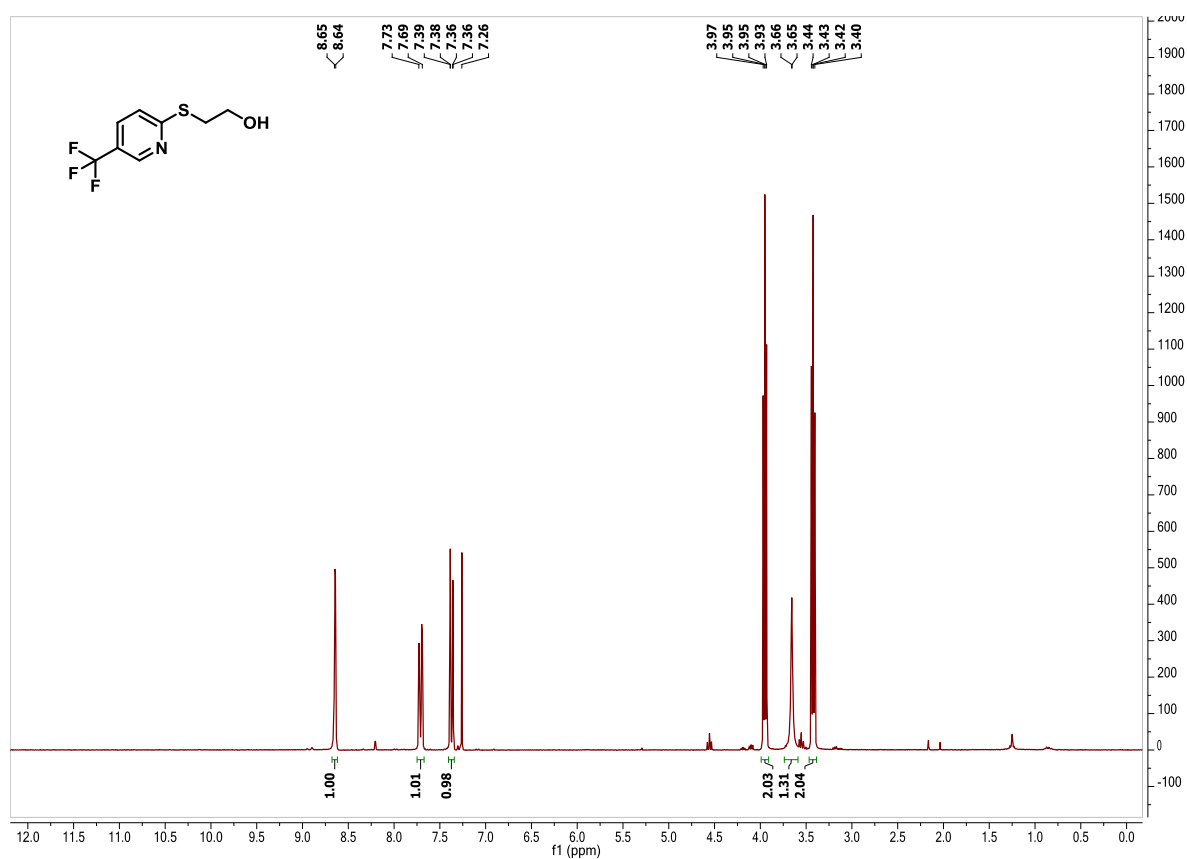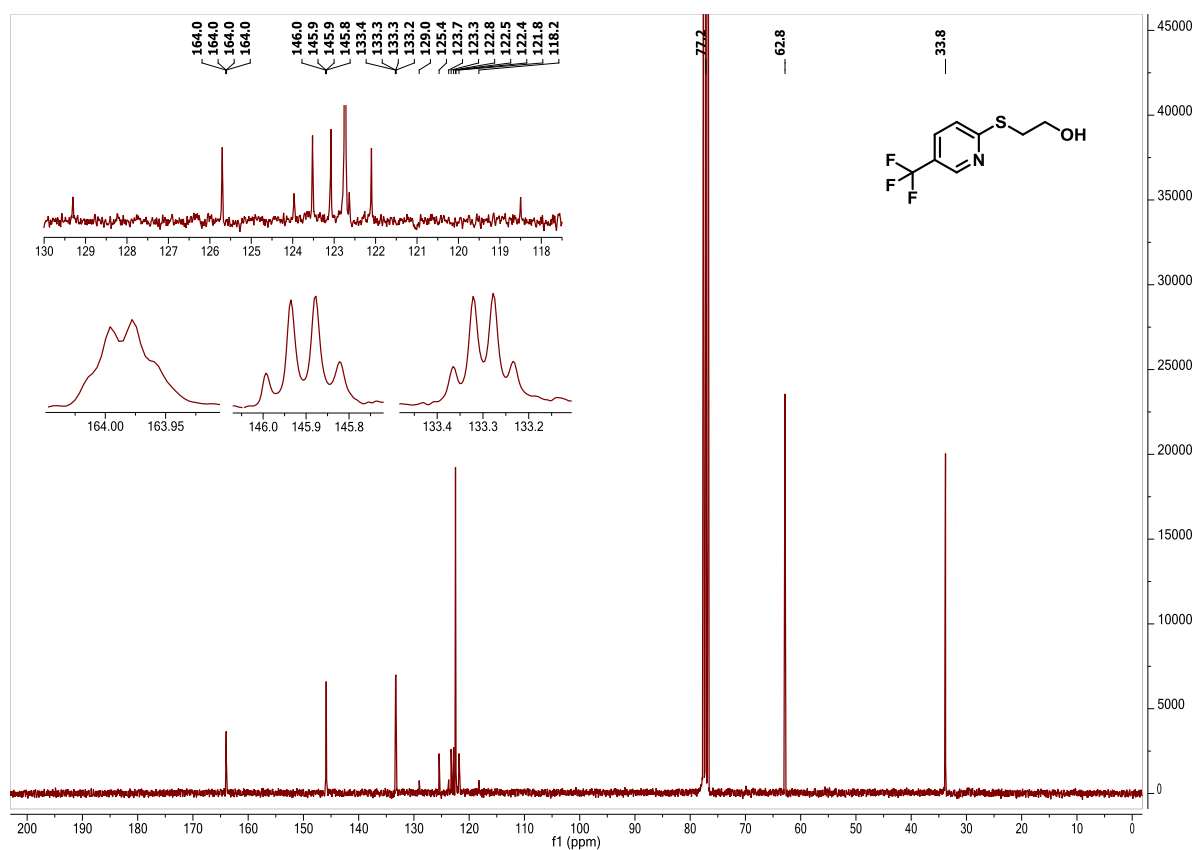

**2-(2-bromophenyl)-3-((2-hydroxyethyl)thio)-3-(4-(4-methylpiperazin-1-yl)phenyl)propanenitrile (8a - b)**

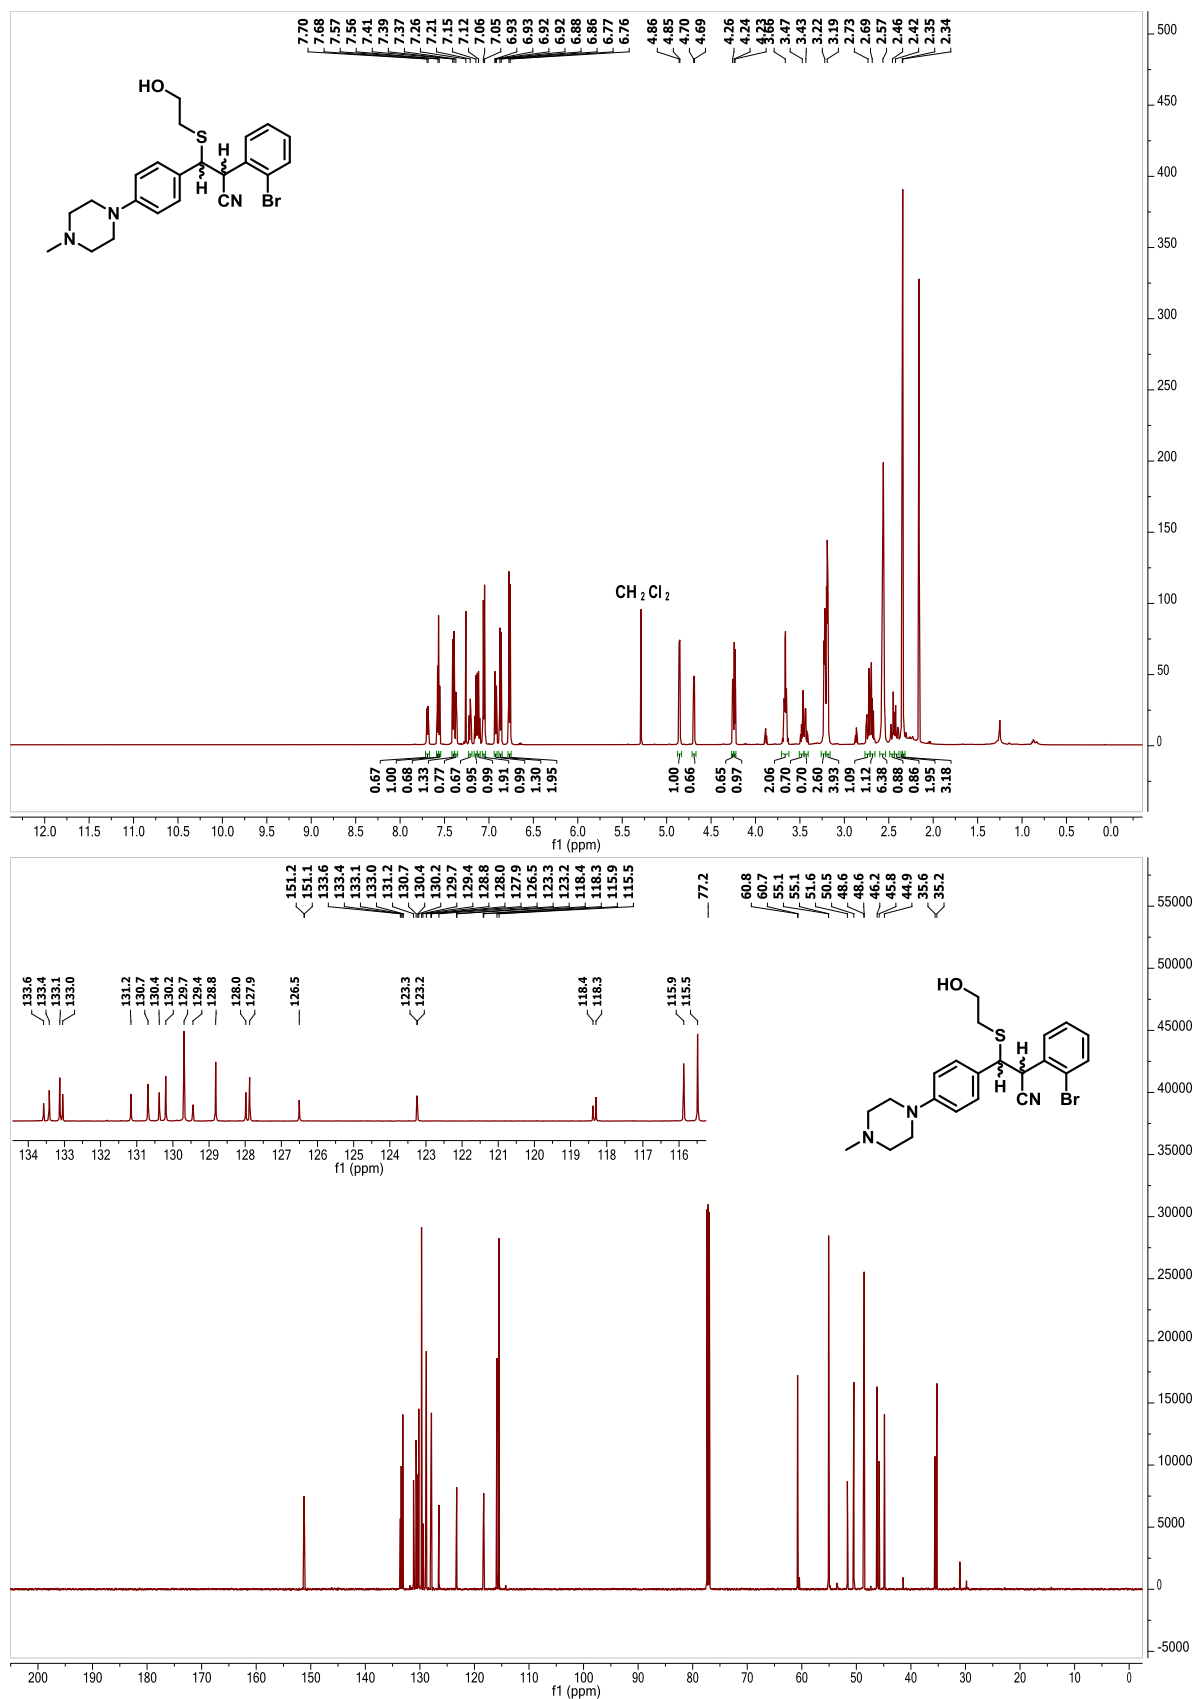

**4-(4-methylpiperazin-1-yl)benzaldehyde (9)<sup>20</sup>**

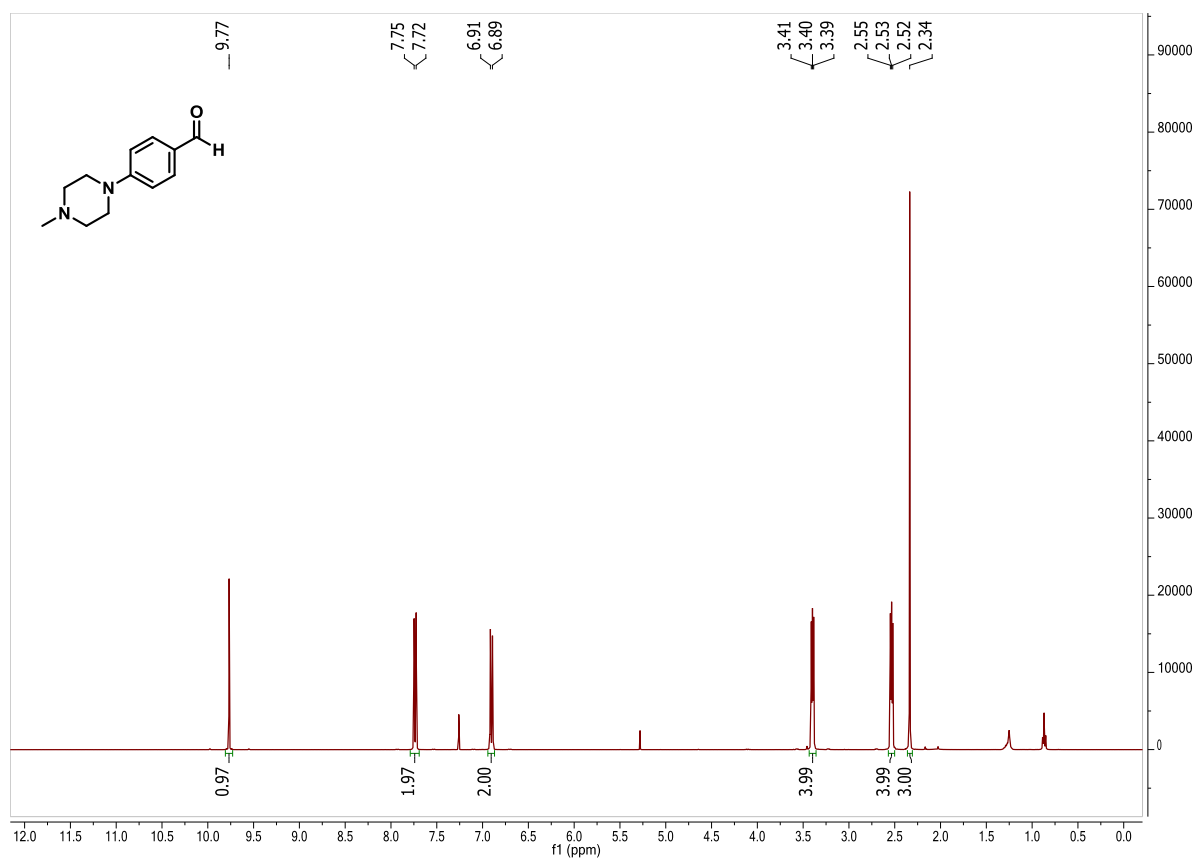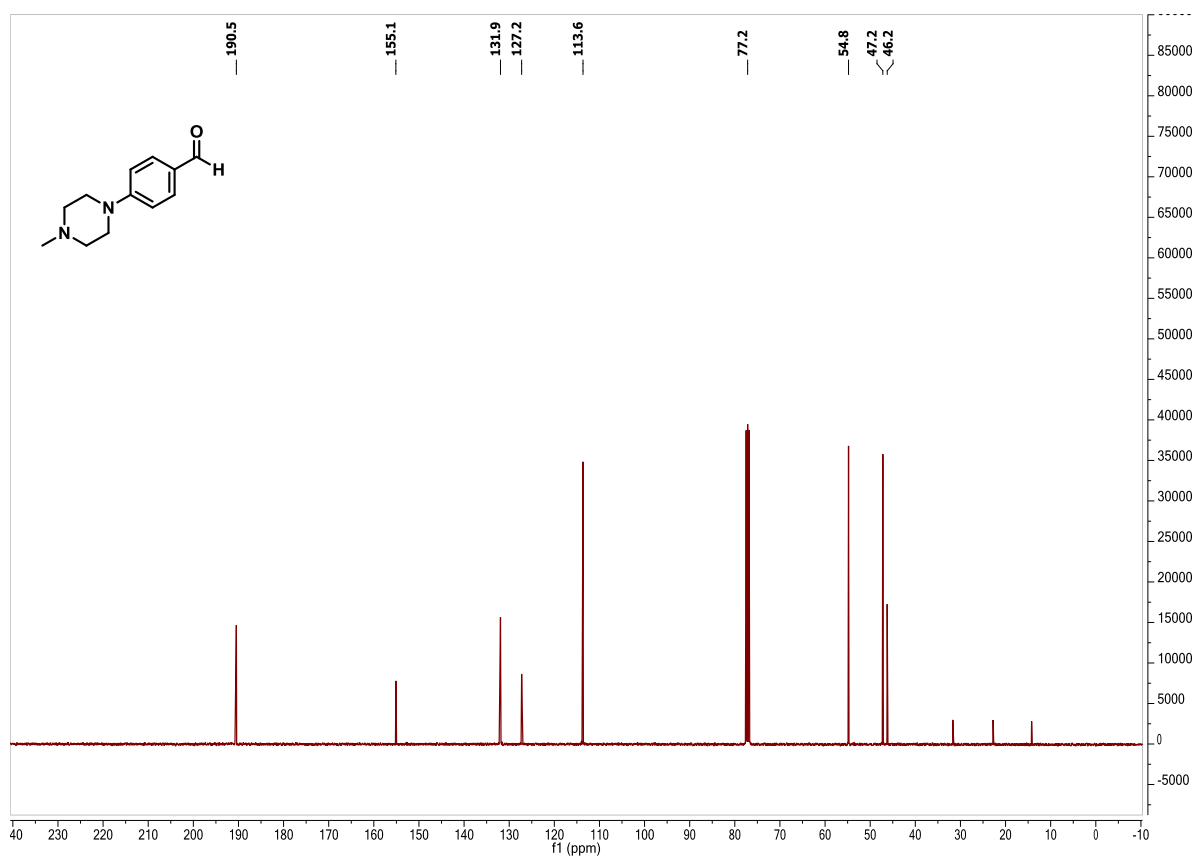

**(Z)-2-(2-bromophenyl)-3-(4-(4-methylpiperazin-1-yl)phenyl)acrylonitrile dihydrochloride(DG172·2HCl, 4·2HCl)<sup>9</sup>**

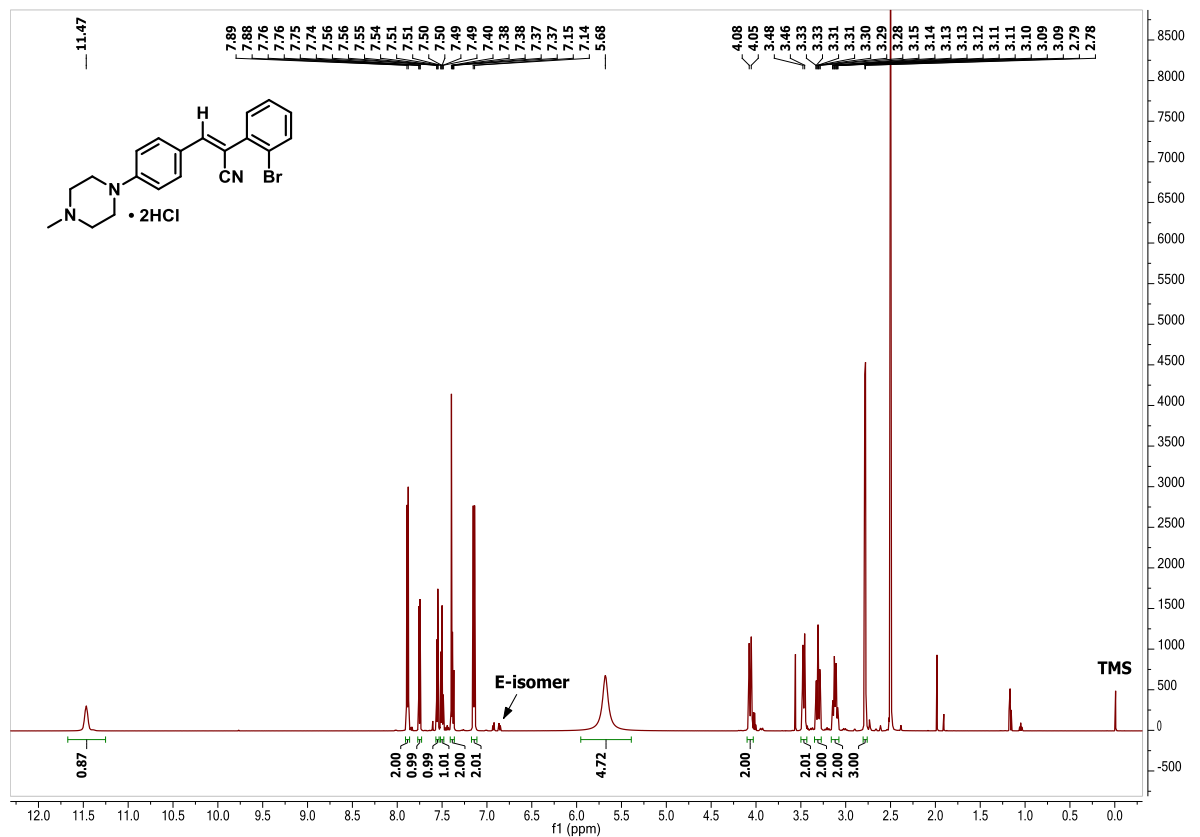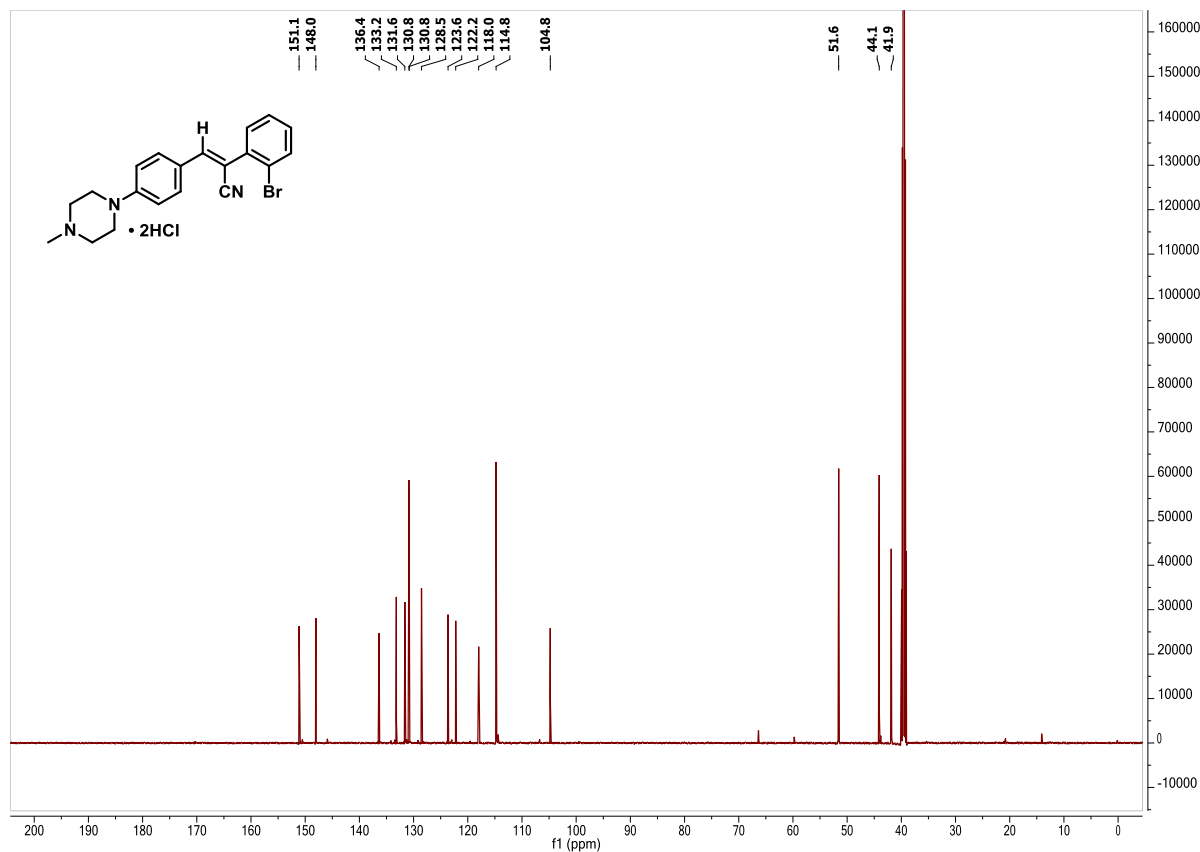

# HIGH PERFORMANCE LIQUID CHROMATOGRAPHY (HPLC) CHROMATOGRAMS

## (Z)-2-(2-bromophenyl)-3-(4-(4-methylpiperazin-1-yl)phenyl)acrylonitrile dihydrochloride (DG172·2HCl, 4·2HCl)<sup>9</sup>

Data file : C:\CHEM32\1\DATA\AASMUND\DG1722HCL-2-OC18.D  
Sample Name: DG1722HCL-2-OC18 1  
=====

|                                     |                   |
|-------------------------------------|-------------------|
| Injection Date : Fri, 17. Apr. 2015 | Seq Line : 0      |
| Sample Name : DG1722HCL-2-OC18      | Location : Vial 2 |
| Acq Operator : Åsmund               | Inj. No. : 0      |
|                                     | Inj. Vol. : 5 µl  |

Acq. Method : C18 ISOKRATISK.M  
Analysis Method : C:\CHEM32\1\DATA\JORN\C18 ISOKRATISK.M  
Sample Info: 10% MeCN, 60% MeOH, 30% H2O/HCOOH (10mM) ->

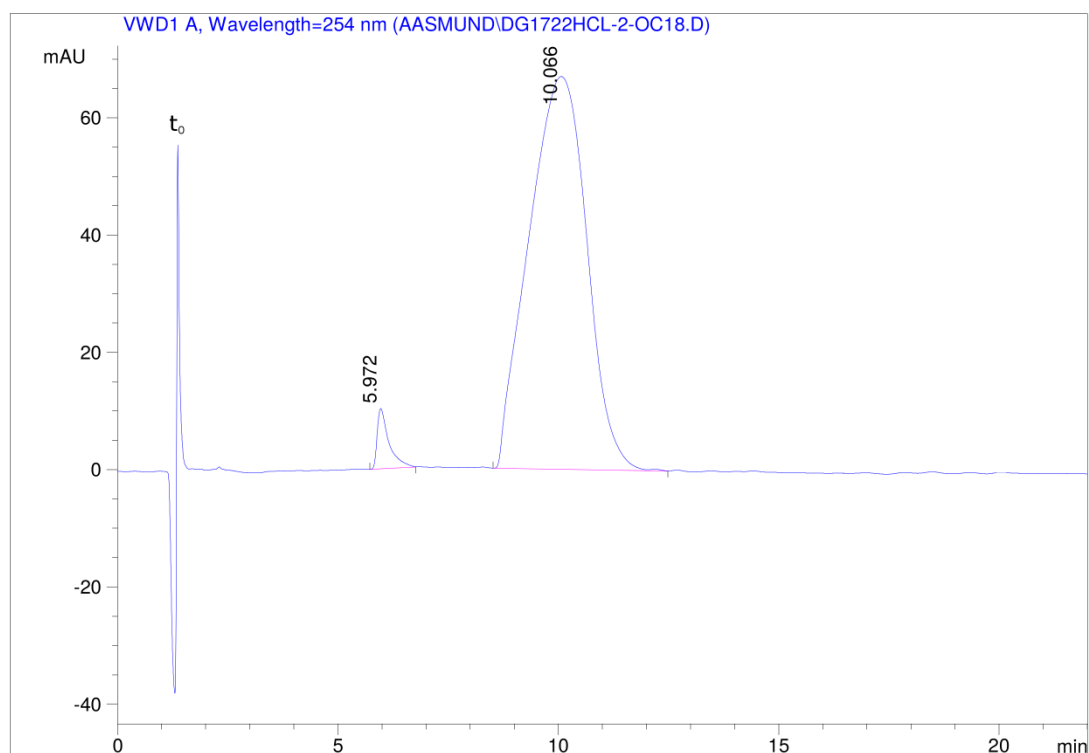

=====  
Area Percent Report  
=====

Sorted By Signal  
Multiplier : 1.000000  
Dilution : 1.000000

Signal 1: VWD1 A, Wavelength=254 nm

| Peak # | RetTime [min] | Type | Width [min] | Area [mAU*s] | Height [mAU] | Area %  |
|--------|---------------|------|-------------|--------------|--------------|---------|
| 1      | 5.972         | BB   | 0.2673      | 1.89320e2    | 10.27770     | 3.0025  |
| 2      | 10.066        | BV   | 1.4673      | 6.11620e3    | 66.97217     | 96.9975 |

=====  
\*\*\* End of Report \*\*\*



## REFERENCES

- 1 B. G. Shearer, R. W. Wiethe, A. Ashe, A. N. Billin, J. M. Way, T. B. Stanley, C. D. Wagner, R. X. Xu, L. M. Leesnitzer, R. V. Merrihew, T. W. Shearer, M. R. Jeune, J. C. Ulrich and T. M. Willson, *J. Med. Chem.*, 2010, **53**, 1857–1861.
- 2 Å. Kaupang, S. M. Paulsen, C. C. Steindal, A. W. Ravna, I. Sylte, T. G. Halvorsen, G. H. Thoresen and T. V. Hansen, *Eur. J. Med. Chem.*, 2015, **94**, 229–236.
- 3 H. E. Gottlieb, V. Kotlyar and A. Nudelman, *J. Org. Chem.*, 1997, **62**, 7512–7515.
- 4 Lanthascreen™ TR-FRET PPAR Delta Competitive Binding Assay Kit Manual, [https://tools.lifetechnologies.com/content/sfs/manuals/lanthascreen\\_PPARdelta\\_competitivebinding\\_man.pdf](https://tools.lifetechnologies.com/content/sfs/manuals/lanthascreen_PPARdelta_competitivebinding_man.pdf), (accessed July 2015).
- 5 F. J. Schopfer, M. P. Cole, A. L. Groeger, C.-S. Chen, N. K. H. Khoo, S. R. Woodcock, F. Golin-Bisello, U. N. Motanya, Y. Li, J. Zhang, M. T. Garcia-Barrio, T. K. Rudolph, V. Rudolph, G. Bonacci, P. R. S. Baker, H. E. Xu, C. I. Batthyany, Y. E. Chen, T. M. Hallis and B. A. Freeman, *J. Biol. Chem.*, 2010, **285**, 12321–12333.
- 6 The UniProt Consortium, *Nucleic Acids Res.*, 2015, **43**, D204–D212.
- 7 B. G. Shearer, D. J. Steger, J. M. Way, T. B. Stanley, D. C. Lobe, D. A. Grillot, M. A. Iannone, M. A. Lazar, T. M. Willson and A. N. Billin, *Mol. Endocrinol.*, 2008, **22**, 523–529.
- 8 P. M. Toth, S. Naruhn, V. F. S. Pape, S. M. A. Dörr, G. Klebe, R. Müller and W. E. Diederich, *ChemMedChem*, 2012, **7**, 159–170.
- 9 S. Lieber, F. Scheer, W. Meissner, S. Naruhn, T. Adhikary, S. Müller-Brüsselbach, W. E. Diederich and R. Müller, *J. Med. Chem.*, 2012, **55**, 2858–2868.
- 10 R. B. Pritchard, C. E. Lough, D. J. Currie and H. L. Holmes, *Can. J. Chem.*, 1968, **46**, 775–781.
- 11 C. F. H. Allen, J. O. Fournier and W. J. Humphlett, *Can. J. Chem.*, 1964, **42**, 2616–2620.
- 12 J. M. Smith, Y. Jami Alahmadi and C. N. Rowley, *J. Chem. Theory Comput.*, 2013, **9**, 4860–4865.
- 13 S. Krishnan, R. M. Miller, B. Tian, R. D. Mullins, M. P. Jacobson and J. Taunton, *J. Am. Chem. Soc.*, 2014, **136**, 12624–12630.
- 14 I. M. Serafimova, M. A. Pufall, S. Krishnan, K. Duda, M. S. Cohen, R. L. Maglathlin, J. M. McFarland, R. M. Miller, M. Frödin and J. Taunton, *Nat. Chem. Biol.*, 2012, **8**, 471–476.
- 15 T. O'Hare, C. A. Eide, A. Agarwal, L. T. Adrian, M. S. Zabriskie, R. J. MacKenzie, D. H. LaTocha, K. J. Johnson, H. You, J. Luo, S. M. Riddle, B. D. Marks, K. W. Vogel, D. R. Koop, J. Apgar, J. W. Tyner, M. W. Deininger and B. J. Druker, *Cancer Res.*, 2013, **73**, 3356–3370.
- 16 Application Note O-091090 - Simple Off-rate Measurements, [https://tools.lifetechnologies.com/content/sfs/brochures/O-091090\\_KBA\\_AppNote\\_OffRates\\_Final.pdf](https://tools.lifetechnologies.com/content/sfs/brochures/O-091090_KBA_AppNote_OffRates_Final.pdf), (accessed July 2015).
- 17 Determination of Drug-Kinase Residence Time in a Homogenous, Low-Volume Format, [http://tools.lifetechnologies.com/content/sfs/posters/Determination\\_of\\_Drug-Kinase\\_Residence\\_Time\\_in\\_a\\_Homogenous,\\_Low-Volume\\_Format\\_v2.pdf](http://tools.lifetechnologies.com/content/sfs/posters/Determination_of_Drug-Kinase_Residence_Time_in_a_Homogenous,_Low-Volume_Format_v2.pdf), (accessed July 2015).
- 18 M. L. Sznajdman, C. D. Haffner, P. R. Maloney, A. Fivush, E. Chao, D. Goreham, M. L. Sierra, C. LeGrumelec, H. E. Xu, V. G. Montana, M. H. Lambert, T. M. Willson, W. R. Oliver Jr. and D. D. Sternbach, *Bioorg. Med. Chem. Lett.*, 2003, **13**, 1517–1521.
- 19 M. Chbani, J.-P. Bouillon, J. Chastanet, M. Soufiaoui and R. Beugelmans, *Bull. Société Chim. Fr.*, 1995, **132**, 1053–1060.
- 20 Rainville, J. P. and Pfizer Global Res & Dev, EP1288208A1, 2003.
- 21 Grayson, G. B. and Zepp, C. M. (Coley Pharmaceutical Group, Inc.), WO2008152471A1, 2008.
